# Supplementary material
Source: publisher site journal article supplement (https://www.dovepress.com/get_supplementary_file.php?f=317447.xlsx)
Supplement: Supplementary file 1 [file get_supplementary_file.php]

## Sheet: Sheet1
Table S1	The Oculocardiac Reflex: A Review		Database of reports, clinical trials and reviews on oculocardiac reflex and trigeminovagal reflexes.
class	AUTHOR	Journal	Title	DATE	Cases		Groups	AGES	RCT	Inclusion	Exclusion	PRE-OP	pre anticholinergic	Route	Induction	Maintenance	opioid?	Anticholinergic	Muscle relax	MONITORING	CO2	gas/agent	INCIDENCE	CRITERIA	HRmin	Average ∆	∆HRmax	EOM TENSION	SURGERY	OCR treatment	Comments	predict?	Fault	Strength
A	Aschner B.	Wein Klin Wchnschr. 1908;44(Oct 29):1529.	Über einen bisher noch nicht beschriebenen Reflex vom Auge auf Kreislauf und Atmung. Verschwind des Radialpulses bei Druck auf das Auge.	1908		1
A	Dagnini G.	Boll di Scienze Med (Bologna). 1908;8:380.	Intorno ad un riflesso provocato in alcuni emiplegici collo stimulo della cornea e colla pressione sul bulbo oculare.	1908		1
A	Petzetakis M.	Bull Soc Med Hosp Paris. 1914;37:816-822.	Réflexe oculo-respiratoire et réflexe oculo-vaso-moteur a l'état normal.	1914		1
A	Kirsch	Arch Ophthalmol 58:348-356	Electrocardiographic changes during ocular surgery and their prevention by retrobulbar injection	1957	50	50	50	.7-92					beladona	both						ECG			0.3	ECG∆	30 bpm		-0.65	compress EOM, enuc	any eye	retrobulbar	48% EOM incidence	GET plane I and III same, intubate not predict in 1
A	Bosomworth	Anesthesiology	The oculo-cardiac reflex in eye muscle surgery	1958	62	62	62	.6-35				secobarb and demorol	scopolamine	GET	thiopental	ether, N2O	demerol		curare	ECG, EEG		ABG	0.82	0.1				routine	strabismus	retrobulbar	MR>LR, retrobulbar no help	ABG all normal
A	Rhode	Am J Ophthalmol	A study of the electrocardiographic alterations occurring during operations on the extraocular muscles	1958	13	13	13	11_88				uncontroled		both	uncontroled					ECG			0.48	10 bpm	43 bpm			EOM enuc	Enuc, strabismus		deep anesthesia reduces OCR, dogs anoxemia no OCR
A	Deacock	Brit J Anaesth	The prevention of reflex bradycardia during ophthalmic surgery	1962	30	30	10	4_49				paperaveratum	hyoscine	GET	thiopentone	halothane, N2O			suxamethonium	ECG			0.8	0.1	25	-0.33	-0.51	planned	strabismus		no dif between MR, LR. IO
A	Deacock			1962			10	4_43				paperaveratum	hyoscine	GET	thiopentone	halothane, N2O		gallamine	suxamethoinum	ECG			0.4	0.1	75	-0.1	-0.21	planned	strabismus	gallamine	no age correlation
A	Deacock			1962			10	5_51				paperaveratum	hyoscine	GET	thiopentone	halothane, N2O			tubocurarine, suxamethonium	ECG			1	0.1	32	-0.32	-0.63	planned	strabismus
A	Mendelblatt	Am J Ophthalmol 53:506-512	A study comparing methods of preventing the oculocardiac reflex	1962	50	50	50	15_87				demerol, nembutol		local			demerol			ECG			0.18	ECG∆			-0.5	compress, inject, EOM	any eye	block, atropine IV	block better than atropine
A	Reed	Brit J Ophthalmol	Cardiac Slowing during Strabismus Surgery	1962	77	77	77	1_14					atropine SQ	GET	thiopental PR	ether, cyclopropane, N2O		gallamine(11), atropine	sux	ECG, EEG			0.79	10%(any)			-0.76	routine	strabismus	retrobulbar, atropine, gallamine	best block atropine	not correlated with age, weight, pre-heart rate
A	Berler	Am J Ophthalmol. 1963;56:954-959.	The Oculocardiac Reflex	1963	50	50	50	1.5-86						both						ECG			0.32	ECG∆				compress, EOM retrobulbar	any eye	retrobulbar	sQ atropine no prevent, block 100%
A	Taylor	Anesthesiology	Prevention of the oculo-cardiac reflex in children: Comparison of retrobulbar block and intravenous atropine	1963	157	157	55	kids				meperidine	atropine IM	GET	halothane, nitrous	halothane			sux	ECG		"light"	0.58	20 bpm				routine	strabismus
A	Taylor			1963			51	kids				meperidine	atropine IM	GET	halothane, nitrous	halothane		atropine	sux	ECG		"light"	0.28	20 bpm				planned, pressure	strabismus	atropine	works 30 min	deliberate pressure 67% OCR not correlated to EOM
A	Taylor			1963			51	kids				meperidine	atropine IM	GET	halothane, nitrous	halothane			sux	ECG		"light"	0	20 bpm				planned, pressure	strabismus	retrobulbar
A	Moonie	Can Anaesth Soc J	The oculocardiac reflex during strabismus surgery	1964	66	66	66	1_32				meperidine	atropine	GET	thiopental	halothane, nitrous			sux	ECG		intrabronchial CO2	0.66	0.1	20bpm			routine, prolonged	strabismus	fatigue only if short interval	OCR even with normal CO2	ocular pressure 2/8, 5/8 OCR, not intubation
B	Brusilovskaia DA, Tumarkin BM	Vrach Delo. 1965;1:134-135	Studies on the oculocardiac reflex with the use of arterial oscillography	1965																arterial oscillography
B	Kudo Y	Masui. 1965;14(9):851-857.	Electrocardiographic studies on oculocardiac reflex during anesthesia. 2. Effect of anesthetic methods upon oculocardiac reflex	1965				kids												ECG
B	Ostachowicz M, Burau J, Sadkiewicz A.	Ophthalmologica. 1965;150(4):259-262.	The oculocardiac reflex during surgical correction of strabismus in local anesthesia.	1965																ECG
A	Welhaf	Arch Ophthalmol	The oculocardiac reflex during extraocular muscle surgery	1965	78	78	78	2_14				pentobarb	scopolamine	GET	halothane 2%	halothane .5-1%				ECG			0.56	10bpm	48bpm		-0.54	deliberate traction	strabismus	atropine IV	preop scopolamine no help
A	Pöntinen	Acta Ophthalmologica 86 (suppl):5-66	The importance of the oculocardiac reflex during ocular surgery	1966	810	810	101						scopolamine IM	local						ECG				>10 bpm				deliberate EOM tension	any eye	atropine or wait	identify "positive" and negative OCR, vagal and sympathetic arrhythmias
A	Pöntinen			1966			362						scopolamine IM	GET	halothane	halothane nitrous			sux	ECG				>10 bpm				deliberate EOM tension	mainly strabismus	atropine or wait
A	Pöntinen			1966			218	6_21						neurolept	phenoperidine haloperidol hydergine	nitrous 66%		none	sux	ECG		controled		>10 bpm				deliberate EOM tension	any eye	atropine or wait	SR traction suture for cataracts
A	Pöntinen			1966			129						atropine IM	neurolept	fentanyl dehydrobenzperidol	nitrous 66%		none	sux	ECG				>10 bpm	3.8 bpm			deliberate EOM tension	any eye	atropine or wait
B	Yamamoto M, Horiguchi S	Nippon Ganka Kiyo. 1966;17(2):140-144.	A study on oculocardiac reflex during eye surgery	1966									atropine IM																retina strabismus
B	Benzer H, Kacetl E, Muhar F, Rauter G, Thoma H	Anaesthesist. 1968;17(5):157-163.	Pulse rate measurement in eye surgery. Advantages of a linear frequency registration as an illustration of the oculocardiac reflex	1968				all
B	Buchhalter I, Bauch K	Klin Monatsbl Augenheilkd. 1968;152(4):543-550.	The oculocardiac reflex during oculopressure	1968				all																				globe pressure
B	Defalque RJ	Acta Ophthalmol. 1969;47(4):998-1003.	Retrobulbar block for oculocardiac reflex: duration of protection by common local anesthetics.	1969																										block
B	Faupel L, Niedermeier S	Klin Monatsbl Augenheilkd. 1970;156(4):487-497.	Oculocardiac reflexes in primary glaucoma	1970
B	Vajnorsky J, Kohoutova M	Cesk Pediatr. 1972;27(1):11-14.	Oculocardiac reflex--normal values in 9-year-old children	1972				9
B	Fessl-Alemany E, Stocker L, Taube HD, Wessing A	Klinische Monatsblatter fur Augenheilkunde. 1973;162(2):254-262.	General anaesthesia in ophthalmic surgery. 5 year report from the eye hospital Essen	1973	?
B	Fessl-Alemany E, Wegehaupt R	Albrecht Von Graefes Arch Klin Exp Ophthalmol. 1973;188(1):23-31.	The paradoxical oculocardial reflex and its treatment with pindolol (Visken)	1973	?
A	Apt	Am J Ophthalmol	The oculocardiac reflex in strabismus surgery	1973	243	243	243	0.5-65				IM demerol	atropine im	GET	Halothane	Halothane	demerol IM	none IV		ECG			0.486	0.1				as much as safe	strabismus		n=5 re-ops not predictive, MR most, 623 muscles	5 reops not predictive
A	Alexander	Brit J Ophthalmol	Reflex disturbances of cardiac rhythm during ophthalmic surgery	1975	140	140	100	2-18						GET	N2O, halothane, thiopentone,	Halothane 2%, N2O		none IV	suxamethonium	ECG, ABG			90		38	30 bpm	150-50 bpm		strabismus		PCO2 46-73 in OCR,
A	Alexander			1975			20	2-18				IM pethidine	atropine im	GET	N2O, halothane, thiopentone,	Halothane 2%, N2O		none IV	suxamethonium	ECG			70						strabismus
A	Alexander			1975			20	2-18						GET	N2O, halothane, thiopentone,	Halothane 2%, N2O		Atropine 0.01mg/Kg	suxamethonium	ECG			25						strabismus
A	Fry E, Hall-Parker J	Brit J Ophthal. 1975;59:525.	Hyoscine butylbromide and the oculocardiac reflex	1975	74	74												hyoscine 10-20 mg IV							40 bpm				strabismus		preliminary to iris color paper- not yet mentioned	second EOM one MR had 40 bpm
B	Galkowska I, Nizienska E	Anaesth Resusc Intensive Ther. 1975;3(2):197-200	Cardiac arrest during ophthalmological operations	1975	822	822		all						GET		"general"				ecg			0.002	arrest					ophthalmic	"resuscitation"	NLD strabismus	certain diseases
A	Apivor D, Ravi P.	Anaesthesia. 1976;31:18-22.	Ketamine and the oculocardiac reflex. Dysrythmia in pediatric strabismus surgery: the role of intravenous atropine.	1976	50	50							hyoscine 0.3 mg			ketamine		atropine IV 25		ECG				ECG change		40 - 50%	0.76					25 with atropine within 30 minutes had no changes noted with EOM pull. Subsequent repull or pull other muscle similar changes.
A	Dewar K, Wishart H.	Proc roy soc Med. 1976;69:13-114.	The oculocardiac reflex.	1976	36	36												atropine gallamine					67%%	0.1					strabismus		MR -24% and LR - 9%
B	Jedeikin R, Hoffman S.	Anesth Analgesia. 1977;56(3):333-334	The oculocardiac reflex in eye-surgery anesthesia	1977
B	Apivor D, Ravi PK, Little L.	Anaesthesia. 1978;33(6):542-545.	Cardiac effects of intravenous atropine. Electrocardiographic studies during ketamine anaesthesia.	1978				kids										atropine
A	Anderson	Arch Ophthalmol. 1978;96:1418-1420.	The blepharocardiac reflex	1978	47	47	47							local	lidocaine					ECG, BP			0.17	ECG∆	40 bpm		-0.5	lid	lid	atropine IV	BP dropped
A	Fry	Brit J Ophthalmol 62:116-117	Eye hue and the oculocardiac reflex	1978	363	363	198	>12<				Im papaveretum, prochloroparazine, trimeprazine	IM atropine .6-.6mg	GET	N2O, halothane	halothane 1% nitrous		none	sux	cardiorater + ECG		1% halothane		10 bpm				MR planned	strabismus		Brown eyes(84%) had more than blue (61%)
A	Lhuissier-Noel C, Gajdos A, Rousselie F, Fontaine M, Viars P.	Anesth Analg. 1979;36(7-8):337-342.	Oculocardiac reflex in ocular surgery. Some means of prevention from consequences	1979	80	80		adult									morphine												retinal detachment		morphine helped protect, block no effect, parasympatholytic helped
B	Bosoni P, Salvi E, Palvarini E.	Minerva Anestesiol. 1981;47(3):95-102.	The oculocardiac reflex in strabismus surgery	1981
B	Ge XY.	Chung Hua Yen Ko Tsa Chih. 1982;18(4):218-219.	The oculocardiac reflex of children during extraocular muscle operation under general anesthesia (report of 60 cases)	1982	60	60		children																					strabismus
A	Hunsley	Brit J Anaesth		1982	80	80	80	1_12				trimeprazine, morphine		GET	thiopentone	N2O	morphine	glycopyrrolate vs atropine	tubocurarine	ECG			0.7	0.1		-0.3	-0.7	planned maximum	strabismus	IV atropine vs glycopyrrolate early	MR > LR
A	Mirakhur RK, Jones CJ, Dundee JW, Archer DB	Br J Anaesth. 1982;54(10):1059-1063.	I.m. or i.v. atropine or glycopyrrolate for the prevention of oculocardiac reflex in children undergoing squint surgery	1982	160	160	20	1-14y	RCT			none	none	GET	thiopentone or halothane	halothane nitrous			suxamethonium	ECG		spontaneous	0.8	0.2				deliberate	strabismus	more atropine or stop EOM	arrhythmias = 36/160 AV nodal; 9/160 PVC
A	Mirakhur			1982			60	1-14y				none	IM glyco or atropine	GET	thiopentone or halothane	halothane nitrous			suxamethonium	ECG		spontaneous	0.37	0.2				deliberate	strabismus	6/160 for <70bpm	58/144 MR 1st EOM; 3/16 LR 1st EOM
A	Mirakhur			1982			40	1-14y				none	IV glycopyrrolate	GET	thiopentone or halothane	halothane nitrous			suxamethonium	ECG		spontaneous	0.1	0.2				deliberate	strabismus		OCR on 1st EOM =61, OCR on 2nd EOM = 8
A	Mirakhur			1982			40	1-14y				none	IV atropine	GET	thiopentone or halothane	halothane nitrous			suxamethonium	ECG		spontaneous	0.075	0.2				deliberate	strabismus
A	Blanc	Can Anaesth Soc J	The oculocardiac reflex: a graphic and statistical analysis in infants and children	1983	49	49	49	0.5-9				IM meperidine, hydroxyzine	atropine im	GET	N2O, halothane	Halothane 1%, N2O 60%		none	none	ABG			0.59	-7.2 bpm				300 grams	strabismus		MR=other, square wave>gradual, fatigue
A	Forestner J, Imbrecht P	Anesthesiology. 1983;59:A457.	Controlled respiration does not inhibit oculocardiac reflex during strabismus surgery in children	1983	30	30		children												CO2, mean emergence time									strabismus		OCR 29% if CO2 35-38 mmHg and 30% spontanneous vent
A	Milot JA, Jacob JL, Blanc VF, Hardy JF.	Can J Ophthalmol. 1983;18(7):314-317.	The oculocardiac reflex in strabismus surgery.	1983	49	49		children												microdisplacement transducer			51%-87%%					calibrated- quick vs progressive	strabismus		quick 87% OCR vs progressive 51% p=0.05
B	Ge XY.	Chung Hua Yen Ko Tsa Chih. 1984;20(3):148-149.	Two methods of mitigating the oculo-cardiac reflex during ocular muscle surgery under general anesthesia	1984																											lidocaine and diazepam
A	Karhunen	Anaesthesia 39:524-528	The oculocardiac reflex in adults: a dose response study of glycopyrrolate and atropine	1984	90	90	90	15_51				pethidine	atropine or glycopyrrolate	GET	thiopentone	halothane, nitrous			tubocuraine, sux	ECG		ETCO2	0.4	0.2		-0.2		planned	strabismus		protective only if tachycardia preop, ETCO2=5%
A	Karhunen	Br J Anaesth 57:1209-12	Comparison of four non-depolarizing neuromuscular blocking drugs in the suppression of the oculocardiac reflex during strabismus surgery in children.	1985	80	80	20	8	RCT			oxycodone IM	atropine IM	GET	fentanyl and thiopentone	Nitrous	oxycodone	none	tubocurarane	ECG, aductor poll evoked potent		ETCO2 5±5%	0.75	20% from ?		-0.28		"traction" LR mainly	strabismus
A	Karhunen			1985			20	6.3				oxycodone IM	atropine IM	GET	fentanyl and thiopentone	Nitrous	oxycodone	none	alcuronium	ECG, aductor poll evoked potent		ETCO2 5±5%	0.3	20% from ?		-0.11		"traction" LR mainly	strabismus		tachycardia and less OCR, no EOM tension,
A	Karhunen			1985			20	7.1				oxycodone IM	atropine IM	GET	fentanyl and thiopentone	Nitrous	oxycodone	none	pancuronium	ECG, aductor poll evoked potent		ETCO2 5±5%	0.65	20% from ?		-0.28		"traction" LR mainly	strabismus		CO2 monitored, preop atropine
A	Karhunen			1985			20	7				oxycodone IM	atropine IM	GET	fentanyl and thiopentone	Nitrous	oxycodone	none	vecuronium	ECG, aductor poll evoked potent		ETCO2 5±5%	0.7	20% from ?		-0.25		"traction" LR mainly	strabismus
B	Garcia Guasch MR, Lapena Bayo C, Garcia de Oteyza J, Martinez de Salinas AD, Chavarria F, Nalda Felipe MA	Rev Esp Anestesiol Reanim. 1985;32(6):284-287.	Oculocardiac reflex in strabismus surgery. Comparative study between atropine and retrobulbar block	1985				children																					strabismus		block vs atropine
B-	Mirakhur RK	Ann R Coll Surg Engl. 1985;67(1):34-36.	Anaesthetic management of vitrectomy	1985	111	111						diazepam		GET	thiopentone	enflurane	fentanyl or phenoperidine		vecuronium or pancuronium									OCR discussed	vitrectomy		The problems and anaesthetic management of patients undergoing vitrectomy are discussed in a series of 111 patients who underwent 129 operations.
A	Mirakhur R, Shepherd W, Jones C	Anaesthesia. 1986;41(8):825-828.	Ventilation and the oculocardiac reflex: Prevention of oculocardiac relfex during surgery for squints: role of controlled ventilation and anticholinergic drugs.	1986	100	100			RCT							halothan N2O				ECG									strabismus		IV glyco blocks OCR more than ventilating		EOM tension not monitored
	Mirakhur						25											none		ECG		spont	72%%	20%%				planned	strabismus
	Mirakhur						25											glyco		ECG		spont	10%%	20%%				planned	strabismus
	Mirakhur						25											none		ECG		vent	100%%	20%%				planned	strabismus
	Mirakhur						25											glyco		ECG		vent	16%%	20%%				planned	strabismus
A	Ohashi	Invest Ophthalmol Vis Sci	Quantitative analysis of oculocardiac reflex by traction on human extraocular muscle	1986	15	15	15	1_10				diazepam	none	GET						ECG			1	ECG∆			-0.48	graded 50-600gm	strabismus	atropine	MR>IO>LR, latency 1-2.5 sec
A	Vrabec	Am J Ophthalmol	Oculocardiac reflex during manipulation of adjustable sutures after strabismus surgery	1986	44	44	44	17-82						local	tetracaine			none	none	digital pulse monitor			0.045	0.1	35		68-35 bpm	adjust suture		seat-supine	n=3 GET OCR did not have adjust OCR
B	Stoica I, Hanna I.	ev Med Interna Neurol Psihiatr Neurochir Dermatovenerol Neurol Psihiatr Neurochir. 1987;32(2):105-119.	Clinical study on the oculocardiac reflex	1987
A	Gold	Ann Ophthalmol 20:473-475	Asystole due to the oculocardiac reflex during strabismus surgery: a report of two cases.	1988	4	4	2	4_13				hydroxyzine po		GET	fentanyl	fluothane, N2O			atracurium	pulse ox		O2 sat			?6bpm			routine	strabismus	atropine, glycopyrrolate	no tracing
A	Gold			1988			2	13_19				hydroxyzine po		GET	thiopental				vecuronium	ECG, pulse ox					?6bpm	75bpm	-0.92	routine	strabismus	atropine, glycopyrrolate	no tracing
A	Queinnec	Ann Fr Anesth Reanim. 1989;8(1):37-41.	Continuous propofol infusion versus enflurane in children operated on for strabismus. Comparison of the quality of anesthesia and recovery conditions	1989	42	42	21	children	RCT			midazolam	atropine PR	GET	propofol 3 mg/Kg	propofol 18 mg/kg/h	dextromoramide 15 µ/Kg		vecuronium	BP, ECG			0.43	0.2					strabismus
	Queinnec						21					midazolam	atropine PR	GET	propofol 3 mg/Kg	enflurane 2%	dextromoramide 15 µ/Kg		vecuronium										strabismus
A	Matarasso A	Plastic Reconstruct Surg. 1989;83(2):243-248.	The oculocardiac reflex in blepharoplasty surgery.	1989	100	100																	0.25	0.1	35 bpm			fat pad resection	blepharoplasty	release traction		"reflex prone patient (RPP) young anxious female light anesthetic and aggressive fad pad resection, medial left eye
A	Watcha MF, Simeon RM, White PF, Stevens JL	Anesthesiology. 1991;75(2):204-209.	Effect of propofol on the incidence of postoperative vomiting after strabismus surgery in pediatric outpatients.	1991	120	120	30	.6 - 12	RCT	ASA 1 2			atropine 0.1	GET	halothane- nitrous	halothane droperidol	morphine 0.1		vecuronium				0.3	0.15							shorter surgery time 50% PONV
	Watcha						30						atropine 0.1	GET	halothane- nitrous	propofol	morphine 0.1		vecuronium				0.55	0.15							more OCR, 23% PONV
	Watcha						30						atropine 0.1	GET	halothane- nitrous	propofol N2o 66%	morphine 0.1		vecuronium				0.33	0.15							60% PONV
	Watcha						30						atropine 0.1	GET	halothane- nitrous	propofol N2) 66 droperidol	morphine 0.1		vecuronium				0.43	0.15							43% PONV
A	Chong J, Tan S.	Singapore Med J. 1990;31:38-41	Oculocardiac reflex in strabismus surgery under general anesthesia- a study of singapore patients.	1990	80	80		adults and kids					IM atropine	GET									77% to 20%%	0.2	heart block						MR>LR, adults more?
A	Dandoy M, Poisson F, Lampl E, et al.	Cah Anesthesiol. 1990;38(4):241-245.	Anesthesia using propofol during surgery of strabismus in children. A comparison of two different protocols of induction and maintenance	1990	100	100	50	children							propofol 6 mg/Kg	propofol 11 mg/Kg	fentanyl 2µ		vecuronium 0.08										strabismus		less frequent OCR and less PONV inject pain slow inject
	Dandoy						50		RCT						propofol 3 mg/Kg	propofol 12 mg/Kg	fentanyl 3 µ												strabismus
A	Eustis H.	Binoc Vis Quart. 1990;5(3):133-138.	Syncopal episodes during postoperative suture adjustments in strabismus surgery: A survey.	1990	survey																										92 of 37,096 adjusts syncope, 1 MI
	Misurya V, Singh S, Kulshrestha V.	nd J Ophthal. 1990;38(2):85-87.	Prevention of oculocardiac reflex (O.C.R.) during extraocular muscle surgery	1990	53	53			rct						ether									10%%					strabismus		IV atropine plus lidocaine best
A	Loewinger J, Friedmann-Neiger I, Cohen M, Levi E.	Anesth Analg. 1991;73(1):25-28.	Effects of atracurium and pancuronium on the oculocardiac reflex in children.	1991	30	30	15	1.5-10				droperidol	none	GET	halothane fentanyl	halothane nitrous		no	pancuronium 100µkg-1	ECG, BP		ETCO2	0.6	0.2		-0.22		not described	EOM		3/15 with conj pull ∆20%, 2nd EOM -25%
A	Loewinger			1991			15	1.5-10				droperidol	none	GET	halothane fentanyl	halothane nitrous		no	atracurium 500µKg-1	ECG, BP		ETCO2	0.9	0.2	20	-0.61		not described EOM	EOM	IV atropine	4/15 with conj pull ∆20%	lower resting HR
B	Yu XM, Wang LH	Chung Hua Yen Ko Tsa Chih. 1991;27(1):34-36.	The oculocardiac reflex during ocular operation under various anesthesia	1991	100	100																						tugging of 154 extraocular muscles	strabismus		The results showed that retrobulbar block was effective in minimizing occurrence of the reflex whether under general or local anesthesia.
A	Munden	Am J Ophthalmol 111:378-9		1991	3	3	33	9-47																					enucleation		dysrhythmias with CN II compression
A	Blanc V, Ruest P, Brisson G, Jacob J-L.	Can J Anaesth. 1991;38(1):43-48.	Serum gastrin and blood glucose levels during halothane-nitrous oxide anaesthesia and strabismus surgery in children	1991	10	10		children					atropine	GET	halothane N2O					serum gastrin				12 bpm					strabismus
B	Dornberger I, Quast D, Velhagen KH, Bellach J, Guckler A.	Dornberger I, Quast D, Velhagen KH, Bellach J, Guckler A.	The oculocardiac reflex during vitrectomy under neuroleptanalgesia	1991	402	402																	0.318	less than 60 bpm							OCR less with DM, slower heart with cardiac disease and meds, SR more than LR
A	Batterbury	Eye 6:293-295	Peribulbar anaesthesia: failure to abolish the oculocardiac reflex	1992	11	11	5	adults				peribulbar 2% lidocaine no wydase	none	GET	"standardized	"standardized		none	"standardized	ECG		"standardized	1	7bpm	13	-0.51	54bpm	500gm 20 sec	vitreoretinal	peribulbar	peribulbar 30 min pre doesn't block
A	Batterbury			1992			6	adults				peribulbar 2% lidocaine no wydase	none	GET	"standardized	"standardized		none	"standardized	ECG		"standardized	0.66	7bpm	36	-0.26	50bpm	150 gm 20 sec squarewave	vitreoretinal		more with more EOM tension
B	Braun GG, Schywalsky M, Naujoks B, Brunner M, Danner U, Hauschild S.	Anaesthesiol Reanimat. 1992;17:57-65.	Atropin versus Glycopyrrolat bei ophthalmochirurgischen Eingriffen.	1992
A	Eustis	Am J Ophthalmol. 1992;114:307-310.	Vagal responses to adjustable sutures in strabismus correction	1992	20	20							atropine	GET	flurane, isoflurane					ECG			0.65	0.1				routine adjust	suture adjust		lid speculum worse, day of surgery20% adjust with 65% OCR, PVC in 3 adjust
B	Klockgether-Radke A, Feldmann M, Braun U, Mühlendyck H.	Anaesthesist. 1992;41:254-259.	Droperidol vs Metoclopramid-Prophylaxie von Erbrechen nach strabismus-operationen bei Kindern	1992	100	100		children	RCT	ASA 1 2		midazolam	none	GET	halothan N2O	halothane	none		vecuronium										strabismus		OCR not correlated to PONV, droperidol better than metoclopramide and saline
A	Braun	Acta Anaesthesiol Scand 37:390-395	Is there a cholinergic and an adrenergic phase of the oculocardiac reflex during strabismus surgery.	1993	25	25	10	4_13	RCT			midazolam PR/PO	none	GET	halothane, nitrous, methohexitone	halothane .8-1.2%		none	vecuronium .15	ECG, BP		ETCO2 5%	1	20 bpm median	?20bpm		-0.75	600gm (0-600)	strabismus	none	counterregulation, i.e. gradual rise HR with sustained pull		only 25	almost ideal
A	Braun			1993			10	4_12				midazolam PR/PO	none	GET	halothane, nitrous, methohexitone	halothane .8-1.2%		atropine	vecuronium .15				0	20 bpm			130 to 120	600gm (0-600)	strabismus	atropine .01	counterregulate despite no bradycardia		tension too high
A	Braun			1993			5	3_10				midazolam PR/PO	none	GET	halothane, nitrous, methohexitone	halothane .8-1.2%		none	vecuronium .15				0	20 bpm				600gm (0-600)	strabismus	parabulbar	no brady or counteregulate
B	Cui W.	Chung Hua Cheng Hsing Shao Shang Wai Ko Tsa Chih. 1993;9(5):355-356, 397.	Blepharoplasty and oculocardiac reflex	1993	100	100																	0.65						blepharoplasty
A	Hertle	J Pediatr Ophthalmol Strab	The intraoperative oculocardiac reflex as a predictor of postoperative vaso-vagal responses during adjustable suture surgery.	1993	120	120	60	12_79				midazolam, fentanyl	none	GET	thiopental, propofol	halothane nitrous		glycopyrrolate		ECG, BP			0.45	0.1				any traction same surgeon	strabismus			45%Y intraop - 85% vasovagal Y
A	Hertle			1993			60					none	none	topical						"pulse", BP			0.35	0.1				adjust following day	adjust		vasovagal 42%	55% N intraop - 6% Y vasovagal, -(sex, EOM, prior surgery, systemic disease)
A	Klockgether-Radke A, Demmel C, Braun U, Mühlendyck H.	Anaesthesist. 1993;42:356-360.	Erbrechen und okulokardiale reflex.	1993	100	100	50		RCT				atropine IV							ECG			0.18	0.15					strabismus		droperidol pre 24/50 and post 15/50	OCR not predictive of PONV
	Klockgeter-						50						none							ECG			0.6	0.15					strabismus
A	Snellen F, Vanacker B, VanAken H.	J Clin Anesth. 1993;5:37-41.	Propofol-nitrous oxide versus thiopental sodium-isoflurane-nitrous oxide for strabismus surgery in children	1993	40	40	20	2_11				midazolam		GET	propofol N2O	propofol 8-12 mg/kg	alfentanyl	atropine 10µ/kg IV	vecuronium .8	ECG, oscillometry, pulse ox, ETCO2		ETCO2	0.5	20% of preinduction				routine	strabismus	atropine IV	less retching (50-20%) propofol
A	Snellen			1993			20	2_11				alfentanyl		GET	thipental	isoflurane	alfentanyl	atropine 10µ/kg IV	vecuronium .8	ECG, oscillometry, pulse ox, ETCO2		ETCO2	0.15	20% of preinduction				routine	strabismus	atropine IV	less retching (50-20%) propofol
A	Arnold RW, Gould AB, MacKenzie R, Dyer JA, Low PA	Ophthalmology. 1994;101(8):1347-1352.	Lack of global vagal propensity in patients with oculocardiac reflex	1994	6	6	6	36-71					none	GET/retrobulbar	thiopental, halothane	halothane		none		ECG		none	1	<21 bpm	6bpm	-0.77	-0.93	routine	strabismus, enuc, block	atropine IV	OCR-Prone	not DR, VM, GP, ?CSM
B	Dowgird M.	Klin Oczna. 1994;96(4-5):171-173.	Aschner's cardio-ocular reflex and its importance in eye surgery	1994	113	113		children												holter 24 hrs p surgery			0.433						post-strabismus		43% bradycardia after strabismus unless IV atropine
B	Juhel A, Chatellier-Miras A, Toulemont PJ, Le Callonnec A, Urvoy M, Malledant Y.	Cah Anesthesiol. 1994;42(5):571-576.	Comparative study of propofol versus thiopental-halothane in the occurrence of oculocardiac reflex and postoperative vomiting after surgery for strabismus in children	1994				children								halothane vs propofol															propofol less PONV but more OCR
A	Arnold RW, Wolfe T, Albrecht W, et al	Binoc Vis Strabismus Q. 1996;11(4):281-288.	Continuous monitoring and control of end-tidal anesthetic agent and CO2 mitigates the oculocardiac reflex during strabismus surgery.	1996	45	45	45	.9-56				none	none	GET	thiopental, halothane or isoflurane	halothane or isoflurane (deep) nitrous		none	vecuronium	ECG		endtidal CO2, agent deep	0.29	0.1	57 bpm	-8±9%	-0.29	200gm, square-wave, 10 seconds	strabismus	none	deep inhalational, well ventilated reduces OCR	not age, weight, sex, EOM:MR9±2 vs LR 6±2%, agent,
B	Ruta U, Mollhoff T, Markodimitrakis H, Brodner G.	Eur J Anaesthesiol. 1996;13(1):11-15.	Attenuation of the oculocardiac reflex after topically applied lignocaine during surgery for strabismus in children.	1996	56	56	16	3 - 14	RCT			no lidocaine														105 bpm			strabismus MR		less OCR with lidocaine on MR before tension
B	Ruta						10		RCT			lignocaine 1 mg/Kg medial eye														68 bpm			strabismus MR
B	Ruta						30		RCT			none, then 5 min lignocaine														82 then 63 bpm			strabismus MR
B	Wilhelm S, Standl T.	Anasthesiol Intensivmed Notfallmed Schmerzther. 1996;31(7):414-419.	Propofol Vorteile gegenuber Isofluran fur die Sufentanil- supplementierte Anasthesie bei Kindern in der Strabismuschirurgie?	1996	130	130	32	3 - 11	RCT	ASA 1 2		midazolam	atropine po	GET	propofol 2mg/Kg	propofol	sufentanil 0.5 µ/Kg		atracurium												OCR higher with TIVA Propofol maintenance
B	Wilhelm						33					midazolam	atropine po	GET	propofol 2mg/Kg	propofol N2O	sufentanil 0.5 µ/Kg		atracurium
B	Wilhelm						32					midazolam	atropine po	GET	propofol	isoflurane N2O	sufentanil 0.5 µ/Kg		atracurium												PONV worse with inhalational
B	Wilhelm						33					midazolam	atropine po	GET	thiopentone	isoflurane N2O	sufentanil 0.5 µ/Kg		atracurium
B	Ruta U, Gerding H, Mölhoff T.	Ophthalmologe. 1997;94:354-359.	Einfluß von lokal appliziertem Lidocain auf die Auspragung des okulodardialen Reflex.	1997	140	140	70		RCT			lidocaine 1mg/Kg to EOM		GET		"standard"							37.1%%	0.029		0			strabismus or retina
B	Ruta						70					saline to EOM		GET		"standard"							86.1%%	40%%	6	0.148			strabismus or retina		10 patients without topical with HR 6 or less
A	Tramér M, Fuchs-Buder T, Sansonetti A, Rifat K.	Can J Anaesth. 1997;44(8):830-835.	Low incidence of the oculocardiac reflex and postoperative nausea and vomiting in adults undergoing strabismus surgery.	1997	97	97	32	18 - 86	RCT				atropine 10 µ/Kg	GET	thiopentone	isoflurane N2O	alfentanil 10 µ/Kg		vecuronium		32 - 45		0.13	20% number needed to harm%				deliberate	strabismus		PONV 13%
A	Tramér						29						atropine 10 µ/Kg	GET	propofol 3 mg/Kg	propofol N2O	alfentanil 10 µ/Kg		vecuronium		32 - 45		0.14	20% number needed to harm%				deliberate	strabismus		PONV 7%
A	Tramér						36						atropine 10 µ/Kg		propofol 3 mg/Kg	propofol air	alfentanil 10 µ/Kg		vecuronium		32 - 45		0.22	20% number needed to harm%				deliberate	strabismus		PONV 11%
B	Zhang Y, Xu D.	Yan Ke Xue Bao. 1997;13(4):219-220.	The oculocardiac reflexes in extraocular muscle operations of generally anesthetized children	1997				children								ketamine													strabismus
B	Allen L, Sudesh S, Sandramouli S, Cooper G, McFarlane D, Willshaw H.	Eye. 1998;12(2):193-196.	The association between the oculocardiac reflex and post-operative vomiting in children undergoing strabismus surgery.	1998	79	79		1 - 13								"standard"							0.646	0.1					strabismus		PONV 36.7% more common with OCR p=0.01
A	Grover	Ophthalm Surg Lasers 29(3):207-212		1998	30	30	15	40_60	RCT	ASA1		diazepam and promethazine	atropine 0.1 mg/Kg IM	GET	thipentone	nitrous 67%, pancuronium, morphine	morphine	none	sux	ECG		Bain's circuit 7-10 ml/Kg	0.53	>10 bpm	10 bpm			400 gm, 25 sec	retina	atropine	SR traction suture for cataracts
A	Grover			1998			15	40_60				diazepam and promethazine	atropine 0.1 mg/Kg IM	peribulbar	lidocaine + bupivicaine 10cc	n/a		none	none	ECG			0.13	>10bpm				400 gm 25 sec	retina
letter	Fry RA.	Eye (Lond). 1998;12 ( Pt 6):1035-1036.	The association between the oculocardiac reflex and post-operative vomiting in children undergoing strabismus surgery	1998
B	Paciuc M, Mendieta G, Naranjo R.	J Cataract Refract Surg. 1998;24(10):1317-1319.	Oculocardiac reflex during laser in situ keratomileusis.	1998	20	20														ECG			0.2						LASIK		suction 4 pts bradycardia and 4 pts tachycardia
A	Tramér	Acta Anaesthesiol Scand 42:117-123	Oculocardiac reflex and postoperative vomiting in paediatric strabismus surgery. A randomised controlled trial comparing four anaesthetic techniques	1998	157	157	40	3-16	RCT				atropine0.2 mg/Kg		thiopentone	isoflurane (no nitrous)	alfentanil	none					0.14								ondansterone reduced post-op nausea in absense of nitrous oxide
A	Tramér			1998			40	3-16					atropine0.2 mg/Kg		thiopentone	isoflurane plus ondansterone (no nitrous)	alfentanil	none					0.14								26%(6 hours) 46%(24 hours) reduced to 8% 33%.
A	Tramér			1998			40	3-16					atropine0.2 mg/Kg		propofol	propofol	alfentanil	none					0.4
A	Tramér			1998			40	3-16					atropine0.2 mg/Kg		propofol/lidocaine	propofol/lidocaine	alfentanil	none					0.4
A	Kim	Yonsei Med J 40:244		1999	16	16								GET																		neural networks: gender and type of muscle
B	Kayikcioglu O, Kayikcioglu M, Erakgun T, Guler C.	Int Ophthalmol. 1999;23(1):37-41.	Electrocardiographic changes during subconjunctival injections.	1999	53	53																	0.472	0.1					subconj injection		compared to 8.6% with venipuncture, more if young	youth more, gender not
A	Stump M, Arnold R.	Binoc Vis Strabismus Q. 1999;14(2):111-116.	Iris color alone does not predict susceptibility to the oculocardiac reflex in strabismus surgery.	1999	466			1-80				varied	none	GET	varied	inhalational		none	varied	ECG		yes	0.32	≥20%		-16 ±19%		200 gm 10 sec square	strabismus	atropine in 2	iris color not predict, IR>SR>MR>LR	not iris color
B	Paciuc M, Mendieta G, Naranjo R, Angel E, Reyes E.	J Cataract Refract Surg. 1999;25(10):1341-1343.	Oculocardiac reflex in sedated patients having laser in situ keratomileusis.	1999	30	30						midazolam					fentanyl			pulse oximeter			0.467	0.1					LASIK sedated		1 >30%,3 >20%, 10>10%, 2 tachycardia
A	Allison CE, De Lange JJ, Koole FD, Zuurmond WW, Ros HH, van Schagen NT.	Anesth Analg. 2000;90(2):306-310.	A comparison of the incidence of the oculocardiac and oculorespiratory reflexes during sevoflurane or halothane anesthesia for strabismus surgery in children.	2000	51	51	25	1-7	RCT				none	LMA	sevo and 66% N2O 1.3 MAC	sevo and 66% N2O 1.3 MAC	alfentanil	none		ECG		1.3 MAC	0.38	≥20%		-0.17		deliberate	strabismus		oculorespiratory reductions in minute ventilation and PECO2 accompanied OCR
A	Allison			2000			26	1-7					none	LMA	halothane and 66% N2O 1.3 MAC	halothane and 66% N2O 1.3 MAC	alfantanil	none		ECG		1.3 MAC	0.79	≥20%		-0.28		deliberate	strabismus
A	Goerlich	Anaesthesiol Reanim 25:17-21	[Effects of sevoflurane versus propofol on oculocardiac reflex--a comparative study in 180 children].	2000	180	180	92	4 - 14	RCT			midazolam	none	GET	sevo and alfentanyl	sevo and alfentanyl	alfentanil	none		ECG			0.14	≥20%				deliberate	strabismus		sevo induction has less OCR,( alfentanyl)
A	Goerlich			2000			88	4 - 14				midazolam	none	GET	propofol and alfentanyl	sevo and alfentanyl		none		ECG			0.75	≥20%				deliberate	strabismus		sevo induction has less OCR,( alfentanyl)
A	Hahnenkamp	Paediatr Anaesth 10:601	Effect of different anaesthetic regimes on the oculocardiac reflex during paediatric strabismus surgery.	2000	39	39	10	4 - 14	RCT				none	GET		propofol and alfentanyl		none		ECG, BP			0.9	0.1				4-6 Newtons, 90 sec	strabismus		oculorespiratory, ketamine less, blood pressure better with ketamine
A	Hahnenkamp			2000			10	4 - 14					none	GET		sevo nitrous		none		ECG, BP			0.9	0.1				4-6 Newtons, 90 sec	strabismus		4 Newtons = 404 grams
A	Hahnenkamp			2000			10	4 - 14					none	GET		ketamine midazolam		none		ECG, BP			0.22	0.1				4-6 Newtons, 90 sec	strabismus
A	Hahnenkamp			2000			10	4 - 14					none	GET		halothane nitrous		none		ECG, BP			0.9	0.1				4-6 Newtons, 90 sec	strabismus
B	Madan R, Perumal T, Subramaniam K, Shende D, Sadhasivam S, Garg S.	Anaesth Intensive Care. 2000;28(1):27-30.	Effect of timing of ondansetron administration on incidence of postoperative vomiting in paediatric strabismus surgery.	2000	120	120		1- - 15	RCT	ASA 1 2		ondansetron pre vs end of case RCT	glycopyrrolate	GET	halothan nitrous	halothane nitrous	pethidine	glycopyrrolate	vecuronium					needing atropine						atropine	PONV same despite OCR needing atropine and whether ondansetron pre or end
A	Kim HS, Kim SD, Kim CS, Yum MK.	Anaesthesia. 2000;55(9):847-852.	Prediction of the oculocardiac reflex from pre-operative linear and nonlinear heart rate dynamics in children.	2000	185	185		x = 8.09						GET									0.29	≥20 bpm					strabismus		OCR+ (n=54), OCR- (n=78), arrythmia (n=53)	39/54 predicted by time- and frequency-domain, and nonlinear dynamic indices of pre-operatively measured RR interval
A	Welters ID, Graef M, Menges T, Beikirch C, Kaufmann H, Hempelmann G.	Graefes Arch Clin Exp Ophthalmol. 2000;238(1):59-63.	Postoperative nausea and vomiting after Faden operation.	2000	247	247	48		RCT			placebo and midazolam			thiopentone	halothane nitrous (66%)		NO	Vecuronium				same						bimedial faden		vomiting more than 45%	OCR similar with Faden and R&R
A	Welters			2000			51					diphenhydrinate suppository and midazolame			thiopentone	halothane nitrous (66%)		NO	Vecuronium				same						bimedial faden		vomiting less than 45%
A	Welters			2000			148					placebo and midazolam			thiopentone	halothane nitrous (66%)		NO	Vecuronium										R&R		vomiting just 23%
B	Shende D, Sadhasivam S, Madan R.	Anaesthesia. 2000;55(10):970-975.	Effects of peribulbar bupivacaine as an adjunct to general anaesthesia on peri-operative outcome following retinal detachment surgery.	2000	60	60	30	adults	RCT			bipivicaine peribulobar		GET									0.3						retina		OCR less frequent and less severe with peribulbar bupivicaine
B	Shende						30							GET			morphine 150 µ/Kg						0.7						retina		more PONV with morphine compared to peribulbar
A	Deb	Paediatr Anaesth. 2001;11(2):161-167.	Safety and efficacy of peribulbar block as adjunct to general anaesthesia for paediatric ophthalmic surgery.	2001	50	50	25	5-14	RCT						meperidine IV		pethidine						more						elective eye		66% vomiting
A	Deb			2001			25								peribulbar block								less						elective eye		20% vomiting
A	Saiah M, Borgeat A, Ruetsch YA, Seifert B, Klainguti G.	Acta Anaesthesiol Scand. 2001;45(1):59-64.	Myopexy (Faden) results in more postoperative vomiting after strabismus surgery in children	2001	120	120		2-12							propofol alfenta	propofol alfenta	alfentanil						0.4						faden		52% vomiting
A	Saiah			2001				2-12							propofol alfenta	propofol alfenta	alfentanil						0.28						conventional rectus strabismus		12% vomiting
B	Welters ID, Menges T, Graf M, Beikirch C, Menzebach A, Hempelmann G.	Anesth Analg. 2000;90(2):311-314.	Reduction of postoperative nausea and vomiting by dimenhydrinate suppositories after strabismus surgery in children.	2000	301	301	150	4-10				placebo and midazolam			thiopentone	halothane nitrous (66%)		NO	Vecuronium				abstract						strabismus		60.1% vomiting
B	Welters			2001			151	4-10				diphenhydrinate suppository and midazolame			thiopentone	halothane nitrous (66%)		NO	Vecuronium				abstract								30.7% vomiting
A	Arnold RW, Farah RF, Monroe G.	Binocul Vis Strabismus Q. 2002;17(4):313-318.	The attenuating effect of intraglossal atropine on the oculocardiac reflex.	2002	804								atropine	oral									0.3	10%%		-6.7±2.7%
A	Arnold			2002									atropine	IV									-0.05			-2.3±9%
A	Arnold			2002			24						atropine	IM deltoid									-0.17			-6.8±2.7%
A	Arnold			2002			15						atropine	IG									0			-0.9±3%
A	Arnold			2002			705						none										0.53			-17.2±8%
B	Mahfouz AK, Nabawi KS.	Retina. 2002;22(5):602-606.	Preemptive analgesia in rhegmatogenous retinal detachment surgery: is it effective?	2002	30	30	15		RCT	ASA 1 - 3				GET															retinal detachment buckle
B	Mahfouz						15			ASA 1 - 3		subtenons		GET									less p<0.001						retinal detachment buckle
A	Machida CJ, Arnold RW	Binoc Vis and Strabismus Quart 2003, 18(2):81-86	The effect of induced muscle tension and fatigue on the oculocardiac reflex	2003	842				intra	adult and pediatric			none				variable							%OCR		-16.9±19%		200g 10sec square			second EOM less OCR -14.6 ±17%
A	Machida			2003			90										variable							paired intra-subject				200 grams
A	Machida			2003			90										variable											400 grams
A	Machida			2003			90										variable											50 grams
A	Machida			2003			30	fatigue									variable
B	Subramaniam R, Subbarayudu S, Rewari V, Singh RP, Madan R.	Reg Anesth Pain Med. 2003;28(1):43-47.	Usefulness of pre-emptive peribulbar block in pediatric vitreoretinal surgery: A prospective study.	2003	85	85	42	6 -13	RCT			peribulbar block		GET									less p=0.0001						vitreoretinal		Less PONV with PONV and post-op opioids
B	Subramaniam						43	6 -13						GET			meperidine												vitreoretinal
A	Özcan A, Günes Y, Haciyakupoglu G	J AAPOS 2003, 7(3):210-212.	Using diazepam and atropine before strabismus surgery to prevent postoperative nausea and vomiting: A randomized, controlled study	2003	50	50	25		RCT			valium 0.15	atropine 0.015 mg/Kg			sevo N2O 67%			vecuronium				0	not defined					BMR IO or R&R		Loss PONV with preop valium atropine
A	Özcan			2003			25									sevo N2O 67%			vecuronium				0.04	not defined
A	Arnold RW, Jensen PA, Kovtoun TA, Maurer SA, Schultz JA	Binocul Vis Strabismus Q 2004, 19(4):215-222.	The profound augmentation of the oculocardiac reflex by fast acting opioids	2004	1029
A	Arnold			2004	49		inter-EOM		intra-								fentanyl 0.15 µ/Kg	none						%OCR				200g 10sec square	strabismus		OCR fast acting opioids more
A	Arnold			2004	12		inter-EOM		intra-								meperidine 1 mg/Kg	none						paired intra-subject				200g 10sec square	strabismus		IR > SR > MR > LR
A	Arnold			2004	6		pre-EOM										remifentanyl	none										200g 10sec square	strabismus		agent and CO2 concentration no difference
A	Arnold			2004	17		pre-EOM										sufentanyl	none										200g 10sec square	strabismus		fentanyl inter-EOM augmented p=0.003
A	Arnold			2004	142		pre-EOM										fentanyl 0.15 µ/Kg	none										200g 10sec square	strabismus
A	Arnold			2004	11		pre-EOM										morphine	none										200g 10sec square	strabismus
A	Karanovic N, Jukic M, Carev M, Kardum G, Dogas Z	Acta Anaesthesiol Scand 2004, 48(10):1301-1305	Rocuronium attenuates oculocardiac reflex during squint surgery in children anesthetized with halothane and nitrous oxide	2004	161	161		3 - 10	RCT	ASA 1
A	Karanovic			2004			51							GET	halothane nitrous	halothane nitrous			rocuronium 0.4 mg				29	0.15				medial rectus manipulation			less PVC with rocuronium but similar bradycardia
A	Karanovic			2004			58							GET	halothane nitrous	halothane nitrous			succinyl choline 1 mg				0.53					medial rectus manipulation			nodal and PVC 6% R,. 22% S, 19% C
A	Karanovic			2004			52							GET	halothane nitrous	halothane nitrous			none				0.44					medial rectus manipulation
B	Tulip H, Norman M, Arnold RW.	J AAPOS. 2004;8(1):100 (abstract).	Oculocardiac reflex: re-operation and arterial blood pressure.	2004	1709		152 re-op	11±16			154 antichol			gen						ECG, A-line			-16 ± 19%	%HR				200g 10sec square	strabismus		A-line did not show peripheral vasoconstriction	profound 50% is 1.6x likely to repeat on reoperation
A	Gilani SM, Jamil M, Akbar F, Jehangir R	J Ayub Med Coll Abbottabad 2005, 17(4):57-59.	Anticholinergic premedication for prevention of oculocardiac reflex during squint surgery	2005	60	60	30	2 - 30	rCT				atropine IV										0.1					squint			Severe bradycardia 40% with no atropine
A	Giliani			2005			30						no atropine	GET									0.7	OCR and "severe"				squint		IV atropine
A	Hakim OM, El-Hag YG, Haikal MA	J Aapos 2005, 9(3):279-284	Strabismus surgery under augmented topical anesthesia	2005	40	40		16 - 46				topical lidocaine 2% jelly		awake	Nalbuphine IV 10 mg		Nubaine			ECG			0					awake adjust	Strabismus one-stage adjust		40 recessed, 22 muscles were resected, 3 muscles were tucked, and 2 muscles were retrieved.
A	Steib A, Karcenty A, Calache E, Franckhauser J, Dupeyron JP, Speeg-Schatz C:	Reg Anesth Pain Med 2005, 30(5):478-483.	Effects of subtenon anesthesia combined with general anesthesia on perioperative analgesic requirements in pediatric strabismus surgery.	2005	40	40	20	children	RCT	ASA 1 2		placebo saline subtenons		LMA	IV
A	Steib			2005			20					bupivicaine subtenons		LMA	IV								less								less OCR with bupivicaine than placebo retorbulbar P<0.01
B	Karanovic N, Carev M, Ujevic A, Kardum G, Dogas Z.	Paediatr Anaesth. 2006;16(9):948-954.	Association of oculocardiac reflex and postoperative nausea and vomiting in strabismus surgery in children anesthetized with halothane and nitrous oxide.	2006	119	119	59	3 - 10	RCT	ASA 1					halothane nitrous	halothane nitrous			rocuronium 0.4 mg/Kg				27%%					medial rectus planned	strabismus		same PONV with or without rocuronium
B							60								halothane nitrous	halothane nitrous			none				47%%					medial rectus planned	strabismus
A	Liu Y, Zeng QY	Zhong Nan Da Xue Xue Bao Yi Xue Ban 2006, 31(1):97-99	[Sevoflurane-N2O inhalation anaesthesia with laryngeal mask airway and propofol-ketamine intravenous anaesthesia in strabismus surgery]	2006	80	80	40	children	RCT					no airway	propofol ketamine IV								70%%								more PONV with volatile
A	Liu			2006			40							LMA	Sevo Nitrous								38%%								sevo nitrous LMA less than IV ketamine propofol OCR
B	Morel J, Pascal J, Charier D, De Pasquale V, Gain P, Auboyer C, Molliex S	Anesth Analg 2006, 102(4):1082-1087	Preoperative peribulbar block in patients undergoing retinal detachment surgery under general anesthesia: a randomized double-blind study	2006	62	62	31	adults RD	RCT	RD		retrobulbar ropivicaine		GET	propofol remi					BIS 40-50			0.193548								retrobulbar less OCR in RD patients
B	Morel			2006			31					placebo saline in lower lid		GET	propofol remi					BIS 40-50			0.548387
A	Gupta N, Kumar R, Kumar S, Sehgal R, Sharma KR	Anaesthesia 2007, 62(11):1110-1113.	A prospective randomised double blind study to evaluate the effect of peribulbar block or topical application of local anaesthesia combined with general anaesthesia on intra-operative and postoperative complications during paediatric strabismus surgery.	2007	45	45	15	2 - 13	RCT	ASA 1 2		peribulabr lidocaine 2%		GET									0.13	episodes cases HR reduction, % HR, ectopics, asystole		0.148		deliberate mainly MR	strabismus	atropine 7%	less OCR with peribulbar		We chose the group size of 15 in each group without conducting a power analysis as there were no previous comparable studies
A	Gupta			2007			15					topical lidocaine 2%		GET									0.73	0.2		0.36		deliberate mainly MR	strabismus	atropine 7%	topical less PONV than Get alone
A	Gupta			2007			15							GET									0.94	0.2		0.415		deliberate mainly MR	strabismus	atropine 20%
A	Chung CJ, Lee JM, Choi SR, Lee SC, Lee JH	Acta Anaesthesiol Scand 2008, 52(9):1273-1277.	Effect of remifentanil on oculocardiac reflex in paediatric strabismus surgery	2008	120	120	60	1 - 9	RCT			ketamine or Versed		LMA	Sevo	sevo N2O 66%			rocuronium				0.28			-11±13%
A	Chung			2008			60	1 - 9				ketamine or Versed		LMA	remifentanil 0.75 µ/Kg	N2O 66%			rocuronium				0.58	>20%		-23±17%					more OCR with remifentanyl from lower baseline
A	Yi C, Jee D	Br J Anesthesia 101:234-8	Influence of the anaesthetic depth on the inhibition of the oculocardiac reflex during sevoflurane anaesthesia for paediatric strabismus surgery	2008	84	84			RCT	ASA1 kids		atropine 0.01mg/Kg IM	atropine IM	GET	thiopental 5mg/Kg sevo 4% N2O 50% rocuronium	sevo adjusted		no	rocuronium	ECG BIS agent CO2		yes		>10%				gentle one EOM R&R	strabismus R&R	stop traction	deeper sevo anesthesia decreases 10% HR OCR		only 10%HR unmasked surgeon no EOM tension small numbers	prospective BIS LR-MR noted
A	Yi			2008			28	4-12												BIS-40		2.1	0.11	>10%	130±11 to 129±11 bpm	-0.01		EOM MR/LR 8/20			EOM tension not monitored surgeon not masked to BIS	light anesthesia with BIS >60 more
A	Yi			2008			28	2-9												BIS-50		1.7	0.32	>10%	131±8 to 121±16 bpm%	-0.08		EOM MR/LR 6/22
A	Yi			2008			28	2-12												BIS-60		1.3	0.71	>10%	134±12 to 112±18 BPM%	-0.16		EOM MR/LR 8/20
A	Chhabra A, Sinha R, Subramaniam R, Chandra P, Narang D, Garg SP	Br J Anaesth 2009, 103(5):739-743	Comparison of sub-Tenon's block with i.v. fentanyl for paediatric vitreoretinal surgery	2009	200	200	100	5 - 16	RCT	ASA 1-2		SubTenons block	none	LMA	isoflurane nitrous	isoflurane nitrous			vecuronium				0.05	to 60 bpm or 20%				routine vitreoretinal	vitreoretinal	cease pull then atropine	PONV similar, post-op Pain F48% SB 31%	bupivicaine lidocaine mix plus topical
A	Chhabra			2009			100					fentanyl IV	none	LMA	isoflurane nitrous	isoflurane nitrous							0.31					routine vitreoretinal	vitreoretinal		sept 06 to dec08	vitreoretinal kids less OCR with subtenons block
A	Ghai B, Ram J, Makkar JK, Wig J, Kaushik S.	Anesth Analg. 2009;108(4):1132-1138.	Subtenon block compared to intravenous fentanyl for perioperative analgesia in pediatric cataract surgery.	2009	114	114	58	.5 - 6	RCT	ASA 1 2		subtenons bupivicain lidocaine			sevoflurane nitrous	sevoflurane nitrous	none						0.05	0.2					pediatric cataract
A	Ghai						56					subtenons			sevoflurane nitrous	sevoflurane nitrous	fentanyl						0.2	0.2					pediatric cataract
A	Seijas O, Gomez de Liano P, Merino P, Roberts CJ, Gomez de Liano R	J Pediatr Ophthalmol Strabismus 2009, 46(4):218-222.	Topical anesthesia in strabismus surgery: a review of 101 cases.	2009	101	101		18 - 83						awake	topical	propofol for anxious	remifentanil						n - 3						strabismus topical	atropine	101 of 567 strabismus cases doen topical	3% of topical had atropine for OCR
A	Mizrak A, Erbagci I, Arici T, Ozcan I, Ganidagli S, Tatar G, Oner U	Clin Ophthalmol 2010, 4:673-679	Ketamine versus propofol for strabismus surgery in children	2010	60	60	30					fentanyl 1 µ/Kg		GET	ketamine		fentanyl		rocuronium				0.36	20% bpm%								OCR ketamine > OCR propofol p=0.02
A	Mizrak			2010			30					fentanyl 1 µ/Kg		GET	propofol		fentanyl		rocuronium				0.833333	20% bpm%
B	Min SW, Hwang JM.	Graefes Arch Clin Exp Ophthalmol. 2011;249(12):1889-1892	Adjustment in patients with asystole during strabismus surgery.	2011	4	4		28 - 53		asystole EOM													0.5	0.2					suture adjustment		1/4 severe OCR with sitting and conj manipulation	OCR prone asystole 50% with >20% and one severe OCR
A	Mizrak A, Erbagci I, Arici T, Avci N, Ganidagli S, Oner U	Med Princ Pract 2011, 20(5):427-432.	Dexmedetomidine use during strabismus surgery in agitated children.	2011	60	60	30	2 - 9	RCT	ASA 1 2		dexmedetomidine 0.5 µ/Kg		GET	ketamine			none	rocuronium				0.3	0.2					strabismus	atropine	reported the percent who did not have OCR	agitated children pre-op Precedex less OCR
A	Mizrak			2011			30	2 - 9				placebo		GET	ketamine 1 mg/Kg			none	rocuronium				0.77	0.2
A	Oh JN, Lee SY, Lee JH, Choi SR, Chin YJ.	Korean J Anesthesiol. 2013;64(6):500-504.	Effect of ketamine and midazolam on oculocardiac reflex in pediatric strabismus surgery.	2013	61	61	30	children	RCT		CNS heart		none	GET	ketamine	sevoflurane nitrous		none	rocuronium	BP	30 - 35	1 - 1.3 MAC	0.1	0.2		2.7±15%		routine	strabismus	cease atropine	49 of 61 LR
A	Oh						31						none	GET	midazolam	sevoflurane nitrous		none	rocuronium	BP	30 - 35	1 - 1.3 MAC	0.194	0.2		-0.9±16%		routine	strabismus		BP higher with ketamine
A	Sinha R, Chandralekha, Batra M, Ray BR, Mohan VK, Saxena R.	Anaesthesia. 2013;68(7):747-752.	A randomised comparison of lidocaine 2% gel and proparacaine 0.5% eye drops in paediatric squint surgery.	2013	140	140	70 (58)	3 - 14	RCT	ASA 1 2	41 (6 declined)	ganisetron and paracetamol PR	none	LMA	lidocaine gel	isoflurane nitrous	fentanyl	none	atracurium				0.569	60 bpm or 15%							72 to 51 male femaie
A	Sinha						70 (65)	3 - 14			violated protocol	ganisetron and paracetamol PR	none	LMA	proparacaine	isoflurane nitrous	fentanyl	none	atracurium				0.631	60 bpm or 15%
A	Lai YH, Hsu HT, Wang HZ, Cheng KI, Wu KY.	J AAPOS. 2014;18(2):151-155.	The oculocardiac reflex during strabismus surgery: its relationship to preoperative clinical eye findings and subsequent postoperative emesis	2014	123	123		1.5 - 62		ASA 1 2	incomplete 12			GET	thiopentone	sevoflurane nitrous	none		rocuronium				0.37	dysrhythmia or 20%				minimal traction force			7% dysrythmia and 93% bradycardia, ET 37% OCR and XT 41% OCR	OCR1 predicts OCR2 and OCR3, fine stereo, more EOM
B	Ramachandran R, Rewari V, Chandralekha C, Sinha R, Trikha A, Sharma P.	Eur J Ophthalmol. 2014;24(5):643-649.	Sub-Tenon block does not provide superior postoperative analgesia vs intravenous fentanyl in pediatric squint surgery.	2014	67	67	33	2 - 12	rct	ASA 1 2		subtenons		gen									higher
B	Ramachandran						34					ketamine	none	gen			fentanyl
	Espahbodi E, Sanatkar M, Sadrossadat H, Darabi Vafsi ME, Azarshahin M, Shoroughi M.	Acta Med Iran. 2015;53(3):158-161.	Ketamine or atropine: which one better prevents oculocardiac reflex during eye surgery? A prospective randomized clinical trial.	2015	90	90	30	4 - 10	RCT				atropine	gen									0.2						squint
	Espahbodi						30					none	none	gen									0.43						squint
	Espahbodi						30																0.63						squint
B	Aletaha M, Bagheri A, Roodneshin F, Mosallaei M, Yazdani S.	Strabismus. 2016;24(2):74-78.	Oculocardiac Reflex during Strabismus Surgery: Experience from a Tertiary Hospital.	2016	76	76		15±12	observ														0.855	0.15				more for vertical			more less than 20 years, equal for gender, strabismus type, time of surgery,	cyclovertical more - more tension required, more if baseline HR > 60 bpm
A	Bond AN, Beerle BJ, Arnold RW.	J Pediatr Ophthalmol Strabismus. 2016;53(5):318.	Dexmedetomidine Nasal Sedation Produces More Oculocardiac Reflex During Strabismus Surgery	2016	2283		23	15±19				nasal dexmedetomidine	none	LMA	sevoflurane	sevoflurane		none						%HR reduction		-0.336		200g 10sec square	strabismus		Fentanyl induction -26.6±7% vs none -18.6±4%
A	Bond						11					oral midazolam	none		sevoflurane	sevoflurane		none						%HR reduction		-0.289		200g 10sec square	strabismus
A	Bond						102					no sedation	none		sevoflurane	sevoflurane		none						%HR reduction		-0.195		200g 10sec square	strabismus
A	Karaman	J Clin Monit Comput 30:889-893	The effect of anesthesia depth on oculocardiac reflex in strabismus surgery	2016	64	64	32	3-16	RCT	ASA1 kids	neuro Sz unsteady BIS (n=4) preop sedation or cannot IV	none	none	GET	thiopental 5mg/Kg fentanyl 1µKg	desflurane- adjusted N2O 50%			rocuronium 0.6µKg	BIS 40-49	30-35mmHg		0.25	>20%				EOM MR/LR 17/15	strabismus	stop traction IV atropine (n=5)	more OCR with MR and LR, fentanyl controled no anticholinergic	BIS 56 more 20% OCR than BIS 43	low numbers, EOM not quantified	surgeon masked to BIS LR MR noted
A	Karaman			2016			28	3-16												BIS 50-59			0.64					EOM MR/LR 19/9		atropine only severe	ECG BIS CO2 pulse ox temp BP cuff		sample size cal 26 if power 80 sig 05 detect 50% reduction from Hahnekamp 77%
A	Song IA, Seo KS, Oh AY, Baik JS, Kim JH, Hwang JW, Jeon YT:	PLoS One 2016, 11(9):e0162785.	Dexmedetomidine Injection during Strabismus Surgery Reduces Emergence Agitation without Increasing the Oculocardiac Reflex in Children: A Randomized Controlled Trial	2016	103	103	25	2 - 6	RCT	ASA 1	21 declined	none		LMA	sevoflurane nitrous	desflurane		none	none				0.36	bradyarrythmias or 20%				single experienced senior surgeon	strabismus			emergence aggitation more	sample size 28 to detect a 40% difference
A	Song			2016			25				22 disqualified	dexmedetomidine o.25		LMA	sevoflurane nitrous	desflurane		none	none				0.36
A	Song			2016			25				9 protocol violations	dexmedetomidine 0.5		LMA	sevoflurane nitrous	desflurane		none	none				0.36
A	Song			2016			28				neuro disease allergy	dexmedetomidine 1.0		LMA	sevoflurane nitrous	desflurane		none	none				0.37
A	Ibrahim AN, Shabana T	Saudi J Anaesth 2017, 11(1):72-76.	Sub-Tenon's injection versus paracetamol in pediatric strabismus surgery	2017	90	90	30	4 - 8	RCT	ASA 1 2		subtenons bupivicaine	none	GET	propofol	sevo of halothane		none	atracurium				0.2	< 60 bpm					strabismus	cease then atropine	less PONV and aggitation with subtenons		sample size references past studies
A	Ibrahim						30	4 - 8	RCT	ASA 1 2		paracetamol IV	none	GET	propofol	sevo of halothane		none	atracurium				0.23	< 60 bpm					strabismus	cease then atropine
A	Ibrahim						30					paracetamol PR	none	GET	propofol	sevo of halothane		none	atracurium				0.23	< 60 bpm					strabismus	cease then atropine
A	Arnold RW, Biggs RE, Beerle BJ.	J AAPOS. 2018;22(3):211-213.e211.	Intravenous dexmedetomidine augments the oculocardiac reflex.	2018			842	5.5 years	cross sectional			no Precedex	none				none	none				1 EOM	75±24%		2nd EOM	77±22%		200g 10sec square	strabismus	cease then atropine	Mann Whitney p<0.01, fast push
A	Arnold						33	5.6 years				dexmedetomidine IV	none	LMA	sevo	sevo		none					84±16			66±25%		200g 10sec square	strabismus	cease then atropine
B	Ducloyer JB, Couret C, Magne C, Lejus-Bourdeau C, Weber M, Le Meur G, Lebranchu P	Eur J Ophthalmol 2018:1120672118804798.	Prospective evaluation of anesthetic protocols during pediatric ophthalmic surgery	2018	106	106	3	.2 - 7.3	obs	EOM botox			none	gen		dexamethasone and ondansetron		none					0.33								50% (4 of 8) in pediatric cataract
B	Ducloyer			2018	52 strab		52	4.4		strabismus			none	gen		dexamethasone and ondansetron		none					0.65						pediatric eye including 52 strabismus	12/15 to 5/16	50% with pediatric cataract, 33% with Botox inject
A	Ha SG, Huh J, Lee BR, Kim SH.	BMC Ophthalmol. 2018;18(1):103.	Surgical factors affecting oculocardiac reflex during strabismus surgery	2018	99	99	64 +OCR	11±9		ASA 1 2	56% male	thiopentone 5mg/Kg	atropine IV	GET		sevoflurane			rocuronium 0.6 mg/Kg				0.65	<20%			122±18 bpm%	Though a tension gauge was not employed, the surgeon manipulated the extraocular muscle gently with uni- formed tension in each of procedures	traction increase cutting		of 162 EOM 122 LR, 26 MR, 2 SR. 12 IR, 1st EOM OCR 80% and 2nd EOM 30%	multivariate logistic regression no influence gender, age single EOM but highly resection and MR
A	Ha						35 -OCR	8±7			40% male		atropine IV										0.35	less brady			131±16 bpm%
A	Kim SH, Shin HJ	Graefes Arch Clin Exp Ophthalmol. 2018;256(9):1777-1782	Effects of an infratrochlear nerve block on reducing the oculocardiac reflex during strabismus surgery: a randomized controlled trial.	2018	60	60	30		RCT	X(T)		infratrochlear nerve block		gen									0.1	≥15%				not tensioned	incision dissection traction		7%, 87%, 38% to 85, 68, 84 bpm 3 stages of Strab Surgery
A	Kim		no block	2018			30					no block		gen									0.38						MR resect for XT		3%, 20%, 10% to 94, 90 and 96 bpm
A	Arnold RW, Bond AN	Clin Ophthalmol. 2019;14:2279—2283.	Does topical proparacaine improve postoperative comfort after strabismus surgery?	2019	140		60		rct				none	gen	sevo	sevo		none					0.3	0.33		-22±18%		200g 10sec square	strabismus		proparacaine- no change in PONV/pain predicted by OCR	younger patients more OCR %OCR = -0.002 (age) + 24.5%, r(138) = 0.27, p < 0.01
A	Arnold						80						none	gen	sevo	sevo		none					0.225	0.33		-20±18%		200g 10sec square	strabismus		maxitrol alone-	pt with -33% OCR lower HR on recovery room enter
A	Arnold RW, Bond AN, McCall M, Lunoe L	BMC Anesthesiol 2019, 19(1):36.	The oculocardiac reflex and depth of anesthesia measured by brain wave	2019	2833		97	0.2 - 90					none					none		BIS					0.05	79.8+21%		200g 10sec square	strabismus		no protective level of BIS	Delta BIS and delta Narcotrend did not correlate with delta OCR
A	Arnold		Narcotrend	2019			91						none					none		Narcotrend								200g 10sec square	strabismus		no protective level of Narcotrend	OCR more in younger patients
A	Rahimi Varposhti M, Moradi Farsani D, Ghadimi K, Asadi M.	Strabismus. 2019;27(1):1-5.	Reduction of oculocardiac reflex with Tetracaine eye drop in strabismus surgery	2019	70	70	35		RCT			tetracaine (3 drops in 4 directions)											5, 2, 1 release and 1, 1, 0 incision%	20%, 30-40%, >40%				muscle "release" and incision	strab		less OCR in cutting phase same in "release" phase	duration of recovery 1.9±16.6 seconds
A	Rahimi			2019			35					no tetracaine											8, 0, 3 release and 1, 8, 0 incision%	20%, 30-40%, >40%				muscle "release" and incision	strab		2 stages of Strab Surgery	duration of recovery 2.8±13.9 seconds
A	Paciuc-Beja M, Meizner-Grezemkovsky D, Paciuc M, et al.	Med Hypothesis Discov Innov Ophthalmol. 2020;9(2):111-117.	Oculocardiac Reflex During Intravitreal Injection.	2020	532	532		63.8 years		retinal neovascularization			none	awake				none		pulse oximeter			0.033	0.2				injection	Intravitreal injection		asymptomatic bradycardia
A	Zhu YL, Shen WH, Chen QR,	Chin Med J (Engl). 2020;133(7):779-785.	Desflurane anesthesia compared with total intravenous anesthesia on anesthesia-controlled operating room time in ambulatory surgery following strabotomy: a randomized controlled study.	2020	200	200	100	18 - 60	RCT	ASA 1 2		none	none	LMA		TIVA propofol	remifentanil	none	cisatracurium	BIS	35 - 40		0.44	0.2				EOM "movement"	strabotomy	atropine ± ephedrine	hypotension 22%, bradycardia (<50 bpm) 13%, extubation 7.7 min
A	Zhu						100	18 - 60				none	none	LMA		desflurane	none	none	cisatracurium	BIS	35 - 40%	6 - 8%	0.17	0.2				EOM "movement"	strabotomy	atropine ± ephedrine	hypotension 1%, bradycardia 2%, extubation 5.5 min
A	Shin SY, Kim MJ, Joo J.	J Int Med Res. 2020;48(8):1-10	Oculocardiac reflex and oculorespiratory reflex during strabismus surgery under general anesthesia using the laryngeal mask airway with maintenance of spontaneous respiration: A retrospective study.	2020	177	177	89	7±3, <15			36 (25 dif EOM, 11 data lost		none	LMA	propofol	Sevo N2O 50%	none	none		BIS			0.44	0.2				hook and release 161±50 sec	strabismus 58 MR and 69 LR		ORR >20% 24 TV, 2 RR, 8 MV	LR 42% OCR vs MR 47% (trend for more OCR with children and MR)	EOM tension?
A	Shin						52	40±17				midazolam IV timid	none	LMA	propofol	Sevo N2O 50%	none	none		BIS			0.36	0.2				hook and release 156±42 sec	strabismus 42 MR and 44 LR		ORR >20% 2 TV, 1 RR, 2 MV	LR 34% vs MR 38%	EOM tension?
A	Li S, Liu T, Xia J, Jia J, Li W.	BMC Ophthalmol. 2020;20(1):86.	Effect of dexmedetomidine on prevention of postoperative nausea and vomiting in pediatric strabismus surgery: a randomized controlled study	2020	122	122	41	8.2±1	RCT	ASA 1 2	4 lost to follow up?	propofol- saline	none	LMA	saline	sevoflurane	fentanyl	none	cisatracurium				0.68	0.2				"traction"	strabismus 1-4 EOMs	atropine		PONV more pacebo 13 than dex 8,4
A	Li						40	8.2±1				propofol-Precedex 0.3	none	LMA	dexmedetomidine 0.3 µ/Kg		fentanyl	none	cisatracurium				0.5	0.2				"traction"	strabismus 1-4 EOMs	atropine
A	Li						41	8.2±1				propofol-Precedex 0.5	none	LMA	dexmedetomidine 0.5 µ/Kg		fentanyl	none	cisatracurium				0.42	0.2				"traction"	strabismus 1-4 EOMs	atropine	Chi square more OCR than placebo, but not Yates corrected
	Buck LS, Stockton S, Spankovich C, Jordan JR.	Am J Otolaryngol. 2020;41(4):102553.	Pediatric orbital floor fractures and the oculocardiac reflex: Experience from a level I trauma center.	2020	35	35		pediatric		floor fractures						E.R.							0.17	"bradycardia"				orbital floor fracture	orbit fracture	atropine	indication for surgery with floor fracture
A	Arnold RW, Rinner AR, Arnold AW, Beerle BJ	Clin Ophthalmol 14:4253-4261	The impact of re-operation, relatives and race on the oculocardiac reflex	2020	2532		323	.6 -93			block pacemaker		none				some	none	some	ECG					3	85% median%	5%%	200g 10sec square	strabismus	release then atropine	Re-op minimally predictive, race caucasion more, relatives not, adults less, gender and iris color no impact
A	Kilic Y, Gulec S	Braz J Anesth (2021 pending)	The association between surgical technique and oculordiac reflex in pediatric strabismus surgery	2021	53	53		(2-18) 8.4±			ASA >2	none	none	LMA	remi lidocaine propofol	sevo 1-1.5 MAC N2O 50%	remi induction	none	none	ECG			0.62	20% dysrhythmia				not - 1 surgeon	strabismus recessions except SO	release then atropine	Sample size from previous, EOM type no difference, gender equal, 48% first eom vs 6%
A	Arnold RW, Jansen SS, J, Glasionov M, Biggs RE, Beerle BJ.	Clin Ophthalmol. 2021;15:973-81	Anesthetic impacts on the oculocardiac reflex: Evidence from a large, observational study.	2021	3116	0	2532	.6 -93
	Dandekar P, Mohan S, Baranwal V.	Indian journal of ophthalmology. 2021;69(4):923-6.	Oculocardiac reflex in phacoemulsification: Peribulbar vs topical anesthesia.	2021	106	106	52		RCT					peribulbar									0.17	0.2					phacoemulsificatiton
	Dandekar						54							topical									0.2	0.2					phacoemulsification		pain higher
A	Aydin BG, Kucukosman G, Piskin O, Aktas B, Okyay RD, Ugurbas SC, Ayoglu H	JARSS 2021; 29(1):58-64	[Factors affecting oculocardiac reflex in pediatric strabismus surgery]	2021	92	92	86	1 - 15			6 records incomplete	midazolam IV some	none	LMA 84 GET 2	propofol fentanyl IV	sevo 2-3% nitrous 50% and remifentanyl infusion	fentanyl	none	rocuronium some		29-37	2-3%	0.337	0.2				routine one surgeon	strabismus	cease then atropine IV	retrospective premed midazolam (p=.03) less OCR and rocuronium (p<0.05), surgery lasted mean 57±22 minures, remi only 10 of 86, logistic regression analysis, 1/15 through 9/18 one surgeon
	AUTHOR	Journal	Title	DATE	Cases	not redundant	Groups	AGES		Inclusion	Exclusion	PRE-OP	pre anticholinergic	Route	Induction	Maintenance	opioid?	Anticholinergic	Muscle relax	MONITORING	CO2	gas/agent	INCIDENCE	CRITERIA	HRmin	Average ∆	∆HRmax	EOM TENSION	SURGERY	OCR treatment	Comments	predict?	Fault	Strength
			TOTAL		21967	12035
			median			75
			max			822
	AUTHOR	Journal	Title	DATE	Cases		Groups	AGES		Inclusion	Exclusion	PRE-OP	pre anticholinergic	Route	Induction	Maintenance	opioid?	Anticholinergic	Muscle relax	MONITORING	CO2	gas/agent	INCIDENCE	CRITERIA	HRmin	Average ∆	∆HRmax	EOM TENSION	SURGERY	OCR treatment	Comments	predict?	Fault	Strength
	CASE REPORTS
C	Bailey J.	Am J Ophthalmol. 1935;18:22-25.	The oculocardiac reflex A report of a marked reaction following enucleation of the eyeball.	1935	1																								enucleation
C	Störtebecker T	J Neurosurg. 1953;10:682-686	Posttraumatic oculocardiac syndrome from a neurosurgical point of view	1953	1			25																ecg	36			globe pressure	blunt eye trauma			year later minimal change
C	Smith RB, Douglas H, Petruscak J	Can Anaesth Soc J. 1972;19(2):138-142.	The oculocardiac reflex and sino-atrial arrest	1972	1			adult																	12				retinal detachment
A	Robideaux	Anesthesiology. 1978;49:433.	Oculocardiac reflex caused by midface disimpaction.	1978	1		1	22																							midface disimpaction
C	Isenberg SJ, Blechman B	Am J Ophthalmol. 1982;94(3):422-423.	Oculocardiac reflex during postoperative muscle adjustment [letter]	1982	1			adult																					strabismus adjust
C	Mathis A, Bec P, Arne JL, Camuzet F, Lloveras AM.	Bull Soc Ophtalmol Fr. 1982;82(11):1437-1438.	Traumatic rupture during ocular globe compression caused by the therapeutic application of the oculocardiac reflex	1982	1																							globe compression
C	Kerr W, Vance J.	Anesthesia. 1983;38:883-885.	Oculocardiac reflex from the empty orbit.	1983	2																				asystole					atropine IV	stimulate orbit
C	Garrity JA, Yeatts RP.	Am J Ophthalmol. 1984;98(6):818.	The oculocardiac reflex with an orbital tumor [letter]	1984	1																								orbital lymphoma
C	Shanks AB, O'Carroll TM	Anaesthesia. 1984;39(3):291-292.	Oculocardiac reflex from an empty orbit [letter]	1984	1
check	Pryne SJ, Edwards JC.	Anaesthesia. 1985;40(1):88-89.	Vecuronium and the oculocardiac reflex [letter]	1985
C	Shearer ES, Wenstone R	Anaesthesia. 1987;42(11):1207-1208	Bradycardia during elevation of zygomatic fractures. A variation of the oculocardiac reflex.	1987	1
C	Khan FM, Ankutse MM.	Middle East J Anesthesiol. 1988;9(4):383-388.	Oculocardiac reflex during excision of periorbital tumor--a case report.	1988	1																				severe bradycardia and hypotension				resect invasive orbital tumor
C	Arnold RW, Hohberger GG, Gould AB, Jr.	Arch Ophthalmol. 1988;106(7):879.	The oculocardiac reflex in identical twins.	1988	2		2	4						GET				none		ECG		pulse oximetry	1	<20%	35 bpm	-0.49	-0.56	routine	strabismus	none	same day surgery V ET	Identical twins
C	Negrutiu S, Pop R, Cardan E.	Rev Chir Oncol Radiol O R L Oftalmol Stomatol Ser Oftalmol. 1988;32(2):149-151.	Persistent oculocardiac reflex following retrobulbar hematoma. Case report	1988	1																				orbital hematoma
C	Pillunat L, Stodtmeister R, Marquardt R	Klin Monats Augenheilkunde. 1988;193(5):476-480.	Ocular hemodynamics following suction cup oculoression	1988	1
C	Chelsey L, Shapiro R.	J Oral maxillofac Surg. 1989;47:522-523.	Oculocardiac reflex during treatment of an orbital blowout fracture	1989	1																				16				blowout repair		HR from 80 to 16 with IR pull, to 20 with rim bur holes
C	Ziccardi V, Russavage J, Sotereanos G, Patterson G.	Oral Surg Oral Med Oral Path. 1991;71(2):137-138.	Oculocardiac reflex: Pathophysiology and case report	1991	1
C	Altom RL, Wright TE.	J Oral Maxillofac Surg. 1990;48(7):770.	Possible potentiation of trigeminal-vagal response by sufentanil [letter; comment].	1990
	Bailey PL.	Br J Anaesth. 1990;65(5):718-720.	Sinus arrest induced by trivial nasal stimulation during alfentanil- nitrous oxide anaesthesia	1990	1												alfentanil
	Bainton R, Barnard N, Wiles JR, Brice J.	Br J Oral Maxillofac Surg. 1990;28(2):109-110.	Sinus arrest complicating a bitemporal approach to the treatment of pan-facial fractures.	1990	2
C	Ginsburg R, Cartwright M, Murad S, Nelson C.	Ophthalmic Surg. 1992;23(2):135-137.	Oculocardiac reflex in the anophthalmic socket.	1992	1																				50		35bpm	deep fornix suture	socket revision		Blood Pressure fell 150/98 to 85/50 mmHg
C	Hampl KF, Marsch SC, Schneider M, Flammer J.	Ophthalmic Surg. 1993;24(6):422-424.	Vasovagal heart block following cataract surgery under local anesthesia.	1993	1
	Campbell R, Rodrigo D, Cheung L.	Anesth Prog. 1994;41(1):13-16.	Asystole and bradycardia during maxillofacial surgery.	1994	1
C	Fayon M, Gauthier M, Blanc VF, Ahronheim GA, Michaud J.	Anesthesiology. 1995;83:622-624.	Intraoperative cardiac arrest due to the oculocardiac reflex and subsequent death in a child with occult Epstein-Barr virus myocarditis.	1995	1			17					Atropine IV		halothane nitrous														strabismus		LR recession 140 to 70, then cyanosis, then wide ECG 60
c	Green JG, Wood JM, Davis LF.	J Oral Maxillofac Surg. 1997;55(8):856-859.	Asystole after inadvertent intubation of the orbit.	1997	1																								vestibuloplasty
C	Arnold RW, Ellis F, Wolfe T.	J Pediatr Ophthalmol Strabismus. 1997;34(4):252-254.	Prolonged oculocardiac reflex during strabismus surgery under topical anesthesia.	1997	1		1	22		myasthenia		midazolam fentanyl	none	topical	none	tetracaine topically		none	none	ECG		pulse oximeter	1	<50%	31bpm	-0.48	-0.59	gentle EOM (50gm)	strabismus	watch	persisted with sinus bradycardia	not DR, CSM, GP, ?prolonged VM, IR>LR?
	Chelsey L, Shapiro R	J Oral maxillofac Surg. 1989;47:522-523.	Oculocardiac reflex during treatment of an orbital blowout fracture	1989																					16 bpm			Orbital blowout repair
A	Stott	Br J Plast Surg 42:595-597	Reflex bradycardia in facial surgery	1989	1		1	30																			40bpm	orbital presure after RB enuc	prosthesis exam			30 then -40 bpm 2 years apart
C	Ziccardi V, Russavage J, Sotereanos G, Patterson G.	Oral Surg Oral Med Oral Path. 1991;71(2):137-138.	Oculocardiac reflex: Pathophysiology and case report.	1991	1			adult																				blow out fracture
C	Sires B, Stanley R.	Arch Ophthalmol. 1998;116(7):955-956.	Oculocardiac reflex caused by orbital floor trapdoor fracture: An indication for urgent repair.	1998	3			8 - 20												BP					36 bpm			trap door fracture
C	Westerling D, Blohme J, Stigmar G.	Can J Anaesth. 1998;45(8):777-780.	Orbital mass in a child causing somnolence, nausea and bradycardia.	1998	1			4																				orbital mass			nausea vomiting somnolence and bradycardia
C	Locke MM, Spiekermann BF, Rich GF.	Anesth Analg. 1999;88(5):1183-1184.	Trigeminovagal reflex during repair of a nasal fracture under general anesthesia.	1999	1
C	Slade CS, Cohen SP.	Plast Reconstr Surg. 1999;104(6):1828-1830.	Elicitation of the oculocardiac reflex during endoscopic forehead lift surgery.	1999	1
C	Kosaka M, Asamura S, Kamiishi H.	J Craniomaxillofac Surg. 2000;28(2):106-109.	Oculocardiac reflex induced by zygomatic fracture; a case report.	2000	1																				A-V block				zygomatic fracture	pacemaker	pacemaker, then zygomatic repair then pacemaker removal
C	Ward B, Bass S.	Paediatr Anaesth. 2001;11(3):372-373.	The oculocardiac reflex in a congenitally anophthalmic child.	2001	1			child		absent eye
C	Baykara M, Dogru M, Ozmen AT, Ozcetin H.	J Cataract Refract Surg. 2002;28(9):1698-1699.	Oculocardiac reflex in a nonsedated laser in situ keratomileusis patient.	2002	1			21		LASIK																	90 to 40 bpm	vacuum application	LASIK
C	Mimura T, Amano S, Funatsu H,	Ophthalmic Physiol Opt. 2003;23(3):263-264.	Oculocardiac reflex caused by contact lenses.	2003	2			15, 22		HCL															syncope				contact lens insertion	gentle
C	Ghai B, Makkar JK, Arora S.	Paediatr Anaesth. 2006;16(11):1194-1195.	Intraoperative cardiac arrest because of oculocardiac reflex and subsequent pulmonary edema in a patient with extraocular cysticercosis.	2006	1					cystacercosis
C	Kroll HR, Arora V, Vangura D.	Journal of anesthesia. 2010;24(5):757-760.	Coronary artery spasm occurring in the setting of the oculocardiac reflex.	2010	1																										perioperative MI during treatment for OCR
C	Schipke JD, Siegmund K, Taher A, et al	Int J Cardiol. 2015;193:56-57.	Loss of consciousness via oculocardiac reflex during deep breath-hold diving. A case report.	2015	1																										Breath-hold deep divers are exposed at least to hypoxia, increased partial gas pressures, and increased pressure on pulmonary gas volumes In addition, breath-hold divers are also subject to diving reflex, one consequence of which is bradycardia.
C	Katowitz WR, O'Brien M, Kiskis E, Elliott EM.	J AAPOS. 2016;20(1):75-77	An asystolic event after eyelid skin bupivicaine injection during chalazion surgery.	2016	1										bupivicaine lid										asystole				chalazion local
C	Basagaoglu B, Steinberg A, Tung IT, Olorunnipa S, Maricevich RS.	J Craniofac Surg. 2018;29(7):e720-e722.	Oculocardiac Reflex as a Late Presentation of Orbital Floor Fracture.	2018	1
	DesPain AW, Chapman J, Shaukat H.	Pediatr Emerg Care. 2018:pdf.	Oculocardiac Reflex in a Pediatric Trauma Patient.	2018	1			6																				orbital fracture
	Mehmood N, Hasan A.	Pediatr Emerg Care. 2019.	Oculocardiac Reflex: An Underrecognized But Important Association With Orbital Trap Door Fractures.	2019	1					orbital trap-door fraction														triad of bradycardia syncope and nausea
	Bliss A, Cox D, Chaulk D.	Pediatr Emerg Care. 2020.	Oculocardiac Reflex in A 15-Year-Old With Orbital Fractures and Epidural Hematoma.	2020	1		15																				ventricular escape and LBBB
					48
	REVIEWS
R	vanBrocklin M, Hirons R, Yolton R	J Amer Optometric Assoc. 1982;53(5):407-413.	The oculocardiac reflex: A review.	1982			7 studies incidence
R	Dunville LM, Kramer J.	StatPearls. Treasure Island (FL)2019.	Oculocardiac Reflex.	2019
R	Scheiermann P, Herzog F, Siebenhofer A, Strametz R, Weberschock T.	J Clin Anesth. 2018;49:19-25.	Intravenous versus inhalational anesthesia for pediatric inpatient surgery - A systematic review and meta-analysis.	2018			9 RCTs								propofol more OCR (n=257)																propofol more OCR 2 studies 257 patients	clinical or statistical heterogeneity among the studies limits conclusions
R	Cooper J, Medow N, Dibble C	J Am Optom Assoc. 1982;53(5):391-395	Mortality rate in strabismus surgery.	1982																									strabismus		large series of surgical cases collected nationwide showing that strabismus surgery is a relatively safe procedure
R	Yamashita M	Masui. 1985;35(1):2-11.	Oculocardiac relfex and anesthesia	1985
R	Yamashita M.	Mid East J Anesthesiology. 1986;8(5):399-415.	Oculocardiac reflex and the anesthesiologist.	1986																											prevented by a retrobulbar block or the administration of parasympatholytic drugs, well conducted anesthesia and cooperation with the surgeon is much more important.
	Doyle DJ, Mark PW.	an J Anaesth. 1990;37(2):219-222.	Reflex bradycardia during surgery	1990
	Katz J, Feldman M, Bass E	Ophthalmol. 2001;108(10):1721-1726.	Adverse intraoperative medical events and their association with anesthesia management strategies in cataract surgery.	2001	19250					cataract surgery													0.007	arrhythmias
	Meuwly C, Golanov E, Chowdhury T, Erne P, Schaller B.	Medicine (Baltimore). 2015;94(5):e484.	Trigeminal cardiac reflex: new thinking model about the definition based on a literature review.	2015																											Reanalyzed regarding DR
R	Jean YK, Kam D, Gayer S, Palte HD, Stein ALS.	Anesth Analg. 2019.	Regional Anesthesia for Pediatric Ophthalmic Surgery: A Review of the Literature.	2019								retrobulbar in children			dexmedetomidine without adverse effects
	Jingyao S, Liu S, Fan B, Li G, Sun QG.	Medicine. 2021;100(18):e25717.	Perioperative dexmedetomidine reduces emergence agitation without increasing oculocardiac reflex in children	2021	801				11 RCTs																						Precedex does not augment OCR		underpowered studies	Metanalysis of RCTs
	AUTHOR	Journal	Title	DATE	Cases		Groups	AGES		Inclusion	Exclusion	PRE-OP	pre anticholinergic	Route	Induction	Maintenance	opioid?	Anticholinergic	Muscle relax	MONITORING	CO2	gas/agent	INCIDENCE	CRITERIA	HRmin	Average ∆	∆HRmax	EOM TENSION	SURGERY	OCR treatment	Comments	predict?	Fault	Strength
V	Veterinary
V	Vezina-Audette R, Steagall PVM, Gianotti G.	J Am Vet Med Assoc. 2019;255(4):454-458.	Prevalence of and covariates associated with the oculocardiac reflex occurring in dogs during enucleation.	2019	145 dogs					dogs	opioids alpha agonists												7/135	<70%					enucleation		retrobulbar protects dogs
V	Khurana I, Khurana AK, Singh PI, Gombar KK.	Anaesthesia. 1992;47(7):574-578.	Changes in arterial blood pressure during traction of extra-ocular muscles. A study in rabbits.	1992						rabbits																					EOM traction then fall in BP blocked by orbit block but not anticholinergic
V	Khurana I, Sharma R, Khurana AK	Indian J Physiol Pharmacol 2006, 50(2):152-156	Experimental study of oculocardiac reflex (OCR) with graded stimuli	2006	20					rabbits																		graded MR tension			square wave onset at 19 ±8 grams progressive
V	Aserinsky E, DeBias D	Arch Ophthalmol. 1963;69:484-491.	Suppression of the oculocardiac reflex by artificial respiration.	1963	20 dogs					dogs																	6-second R-R	globe pressure
	Parviainen AK, Trim CM.	Equine Vet J. 2000;32(6):555-559.	Complications associated with anaesthesia for ocular surgery: a retrospective study 1989-1996.	2000	review					horses															36 to 26 bpm
	Bruler BC, Vieira TC, Wolf M, Lucina SB, Montiani-Ferreira F, Sousa MG.	Comp Med. 2018;68(2):156-162.	Using the Oculocardiac Reflex to Characterize Autonomic Imbalance in a Naturally Occurring Canine Model of Valvular Insufficiency.	2018	dogs					dogs valve defects																		globe pressure
	AUTHOR	Journal	Title	DATE	Cases		Groups	AGES		Inclusion	Exclusion	PRE-OP	pre anticholinergic	Route	Induction	Maintenance	opioid?	Anticholinergic	Muscle relax	MONITORING	CO2	gas/agent	INCIDENCE	CRITERIA	HRmin	Average ∆	∆HRmax	EOM TENSION	SURGERY	OCR treatment	Comments	predict?	Fault	Strength
T-F	TrigeminoFacial Reflexes
TF	Nath LS	J Indian Med Assoc. 1978;71(1):9-10.	Oculocardiac reflex.	1978																								penetrating ocular trauma
TF	Robideaux V.	Anesthesiology. 1978;49:433.	Oculocardiac reflex caused by midface disimpaction.	1978																								midface repair
TF	Barnard NA, Bainton R.	J Craniomaxillofac Surg. 1990;18(8):359-360.	Bradycardia and the trigeminal nerve	1990	2
TF	Lang S, Lanigan DT, van der Wal M.	Can J Anaesth. 1991;38(6):757-760.	Trigeminocardiac reflexes: maxillary and mandibular variants of the oculocardiac reflex	1991	1
TF	Seo K, Takayama H, Araya Y, Miura K, Someya G	Anesth Prog. 1994;41(1):17-18.	A case of sinus arrest caused by opening the mouth under general anesthesia	1994	1
TF	Cha ST, Eby JB, Katzen JT, Shahinian HK.	J Craniomaxillofac Surg. 2002;30(2):108-111.	Trigeminocardiac reflex: a unique case of recurrent asystole during bilateral trigeminal sensory root rhizotomy.	2002	1			2		hemangioma														asystole
TF	Shih YR, Peng SK, Tsai TC, Luk HN, Chiang CE.	Acta Anaesthesiol Taiwan. 2005;43(2):109-112.	Repetitive junctional rhythm during forehead-lift surgery--a case report.	2005	1			45																junctional rhythm					forehead lift
TF	Schaller B, Cornelius JF, Prabhakar H, et al.	J Neurosurg Anesthesiol. 2009;21(3):187-195.	The trigemino-cardiac reflex: an update of the current knowledge.	2009	review
TF	Bohluli B, Schaller B, Sadr-Eshkevari P, Momen-Heravi F.	J Oral Maxillofac Surg. 2010;68(11):2922	Trigeminal cardiac reflex: another all-or-none law?	2010	letter
TF	Singh GP, Prabhakar H, Ali Z.	J Oral Maxillofac Surg. 2010;68(8):2035	Is prevention or knowledge better than a cure for the trigeminal cardiac reflex?	2010
TF	Meuwly C, Chowdhury T, Sandu N, Reck M, Erne P, Schaller B.	Medicine (Baltimore). 2015;94(18):e807.	Anesthetic influence on occurrence and treatment of the trigemino-cardiac reflex: a systematic literature review.	2015	910															Cerebral State Index			0.153846	BP20% and HR 20%								slight anesthesia more than deep
TF	Meuwly C, Chowdhury T, Sandu N, et al	Front Neurol. 2017;8:533.	Definition and Diagnosis of the Trigeminocardiac Reflex: A Grounded Theory Approach for an Update.	2017	review																										"grounded theory approach" HR change but less emphasis on BP change
TF	Shakil H, Wang AP, Horth DA, Nair SS, Reddy KKV.	World Neurosurg. 2019;122:424-427.	Trigeminocardiac Reflex: Case Report and Literature Review of Intraoperative Asystole in Response to Manipulation of the Temporalis Muscle.	2019	1					orbitozygomatic craniotomy														asystole				temporalis muscle tension
	Maharaj K, Cedrola R, Mirza T.	nn R Coll Surg Engl. 2020:e1-e3	Asystole during Le Fort 1 osteotomy: the trigeminovagal reflex.	2020	1																			asystle				laForte 1 osteotomy
	VAGAL REFLEXES and Globe Pressure
V	Picornell-Darder I, Terzano M, Fructus X, Rostain JC, Naquet R.	Rev Electroencephalogr Neurophysiol Clin. 1977;7(2):170-173	The Vasalva manoeuvre and the E.E.G. in a study of professional and trainee divers	1977	183		2			divers										EEG								OCR = globe pressure			globe pressure compared to Valsalva in professional and trainee divers	alpha rhythm ≤9 c.sec correlated to OCR
V	Gandevia S, McCloskey D, Potter E.	J Physiol (London). 1978;276:383-394.	Reflex bradycardia occurring in response to diving, nasopharyngeal stimulation and ocular pressure, and its modification by respiration and swallowing	1978	8			adults																				globe pressure, BHFI	no		swallowing reduces bradycardia due to GP and DR.
V	Goulon M, Raphael JC, Gajdos P, Patte D.	Nouv Presse Med. 1978;7(21):1866.	Bradycardia and oculocardiac reflex in Landry-Guillain-Barre syndrome	1978				adults		guillain Barre																			no		pathophysiology of OCR and polyradiculitis
V	Hayes RW, McBrearty E.	Med Hypotheses. 1979;5(4):477-480.	An oculo-cardiac hypothesis of sudden unexpected death in infants	1979				infants		SIDS																					sleep position could place infant at risk of vagal globe pressure in 9000 SIDS/year in USA.
V	Miyazaki M	Angiology. 1981;32(2):106-112.	Circulatory response in Aschner and Czermak-Hering tests, with special reference to cerebral circulation	1981	22		2	young elderly atherosclerosis												Doppler,								Aschner and Czermak-Hering compared
V	Folgering H, Wijnheymer P, Geeraedts L.	Int J Sports Med. 1983;4:166-169.	Diving bradycardia is not correlated to the oculocardiac reflex	1983	15															ECG								globe pressure and BHFI			breath-holding with facial immersion in water of 20 degrees C or colder during at least 10 s is a more appropriate test to assess the possibility of severe diving bradycardia and cardiac arrhythmias.
V	Ramet J, Praud JP, D'Allest AM,	Pediatr Res. 1988;24(4):477-480.	Effect of maturation on heart rate response to ocular compression test during rapid eye movement sleep in human infants	1988	33			premi and FT infants												polygraph ECG				RR interval increase				ocular compression	no		Globe pressure blunted with maturation
V	de Broca A, Kremp O, Krim G, Herbaut C, Leke L, Risbourg B.	Pediatrie. 1990;45(6):405-408	Standardization of oculo-cardiac reflex in infants under 3 months of age	1990				infants		SIDS risk																		globe pressure to predict SIDS
V	Arnold RW, Dyer JA, Gould AB, Jr., Hohberger GG, Low PA.	Mayo Clin Proc. 1991;66(8):797-804.	Sensitivity to vasovagal maneuvers in normal children and adults.	1991	30			10-48															0.17	0.15	41 bpm			Honan Balloon 40-50 mmHg			GP correlated with DR and VM,, GP correlated with age
	Kurmyshkin AA, Kurmyshkin NA.	Fiziol Zh SSSR Im I M Sechenova. 1992;78(6):64-69.	Activation of the heart rhythm during negative compression of the eyeballs in healthy subjects	1992																								suction			tachycardia with negative pressure
V	Ramet J, Hauser B, Waldura J, De Prins J.	Pediatr Neurol. 1992;8(2):91-96.	Circadian rhythm of cardiac responses to vagal stimulation tests.	1992	10			children																R-R interval				globe pressure	OCT oculat compression test and TAS thermal air stream		Early morning most globe pressure bradycardia
V C	Arndt GA, Stock MC.	Can J Anaesth. 1993;40(6):511-514.	Bradycardia during cold ocular irrigation under general anaesthesia: an example of the diving reflex	1993	1									GET														eye irrigation			cold water irrigation produced bradycardia
V	Arnold RW	Yale J Biol Med. 1999;72(4):237-244.	The human heart rate response profiles to five vagal maneuvers.	1999	703						anticholinergic re-ops
V	Lucet V, de Bethmann O, Denjoy I.	Biol Neonate. 2000;78(1):1-7.	Paroxysmal vagal overactivity, apparent life-threatening event and sudden infant death.	2000	review			infants		SIDS
V	Reyners AK, Tio RA, Vlutters FG, van der Woude GF, Reitsma WD, Smit AJ.	Eur J Appl Physiol. 2000;82(5-6):487-492.	Re-evaluation of the cold face test in humans.	2000	several groups		6-11 each	adults																				cold bag on face with goggles			apnea promotes bradycardia, avoided globe pressure to isolate DR.
V	Khurana RK.	Clin Auton Res. 2002;12(5):399-403.	Eye examination-induced syncope Role of trigeminal afferents.	2002	1			adults		eye exam syncope
V	Paton JF, Boscan P, Pickering AE, Nalivaiko E.	Brain Res Brain Res Rev. 2005;49(3):555-565.	The yin and yang of cardiac autonomic control: vago-sympathetic interactions revisited.	2005	review
V	Ducrocq J, Cardot V, Tourneux P, et al.	J Sleep Res. 2006;15(2):167-173.	Use of the oculocardiac reflex to assess vagal reactivity during quiet sleep in neonates.	2006	50			neonates		sleep																		globe pressure - standardized			central apnea with bradycardia in 86%	initial quiet sleep episode more prone to OCR and apnea
V	Hamarat Y, Bartusis L, Deimantavicius M, et al.	PLoS One. 2018;13(4):e0196155.	Graphical and statistical analyses of the oculocardiac reflex during a non-invasive intracranial pressure measurement.	2018	157			20 - 75		glaucoma 83 TBI 8 neuro 10			none	awake						noninvasive intracranial pressure			0.009	0.1				GP transducer 0-48 mmHg
	ROP EXAMS
R	Javorka K, Zavarska L.	Cesk Pediatr. 1978;33(3):138-140.	Oculocardiac reflex in premature infants	1978
R	Clarke WN, Hodges E, Noel LP, Roberts D, Coneys M.	Am J Ophthalmol. 1985;99(6):649-651	The oculocardiac reflex during ophthalmoscopy in premature infants.	1985	54			premature															0.31			10% - 59%		ROP exam	Exam		17 (31%) had bradycardia, ranging from 10% to 59% of baseline, coincident with instillation of eyedrops, insertion of an eyelid speculum, pressure on the globe, or stretching of the medial and lateral recti muscles.
R	Brown GC, Tasman WS, Naidoff M, Schaffer DB, Quinn G, Bhutani VK.	Ophthalmology. 1990;97(7):855-858.	Systemic complications associated with retinal cryoablation for retinopathy of prematurity.	1990	80			premature infants							subconj anesthetic					all-night polygraphic recording				arrest				globe pressure	ROP cryo		3 respirator and 1 cardio arrest
nicu	de Montgolfier-Aubron I, de Broca A, Kabeya B, Lego-Popesco S, Chavet MS, Gold F.	Arch Pediatr. 2002;9(5):456-462.	Standardized oculocardiac reflex in ex-premature near full term (93 cases)	2002	93			preterm		healthy														R-R interval	1894 ms	1049 ± 540 ms
R	Schumacher Ac, Ball M, Arnold AW, Grendahl RL, Winkle RK, Arnold RW	Clin Ophthalmol 14:4263-4269	Oculocardiac reflex during ROPO exams	2021	218		ROP vs Strab	GA 23-50		NICU		no topical	none				none	none	none	ECG			0.57	<100 bpm x 15 sec	55 bpm	64±24%	26% strab 5%)	scleral depress Alphonso	scleral depressed ROPO exams		median 55.9% (IQR 41 to 73%) compare strab 87.8% (IQR 72-98%) duration 92±34 seconds Onset 64% rapid vs 17% strab surgery
	Questionable reference:
B	Fry E	Brit J Ophthal. 1983;55:256.	Prevention of the oculocardiac reflex in children undergoing squint surgery.	1983
A	Kil	Anesth Analg. 2000;91(4):1044.	Hypercapnea is an important adjuvant factor of oculocardiac reflex during strabismus surgery.	2000																CO2											Hypercapnea is an important adjuvant factor of oculocardiac reflex during strabismus surgery
